# Supplementary material for: Protocol for a feasibility study of smoking cessation in the surgical pathway before major lung surgery: Project MURRAY
Source: PubMed Central journal article supplement (PMC7651715; doi:10.1136/bmjopen-2019-036568), 2020-11-06
Supplement: bmjopen-2019-036568.draft_revisions.pdf [file bmjopen-2019-036568.draft_revisions.pdf]

# BMJ Open

BMJ Open is committed to open peer review. As part of this commitment we make the peer review history of every article we publish publicly available.

When an article is published we post the peer reviewers' comments and the authors' responses online. We also post the versions of the paper that were used during peer review. These are the versions that the peer review comments apply to.

The versions of the paper that follow are the versions that were submitted during the peer review process. They are not the versions of record or the final published versions. They should not be cited or distributed as the published version of this manuscript.

BMJ Open is an open access journal and the full, final, typeset and author-corrected version of record of the manuscript is available on our site with no access controls, subscription charges or pay-per-view fees (<http://bmjopen.bmj.com>).

If you have any questions on BMJ Open's open peer review process please email [info.bmjopen@bmj.com](mailto:info.bmjopen@bmj.com)

# BMJ Open

## Protocol for a feasibility study of smoking cessation in the surgical pathway before major lung surgery: Project MURRAY

|                               |                                                                                                                                                                                                                                                                                                                                                                                                                                                                                                                                                                                                                                                                                                                                                                                                    |
|-------------------------------|----------------------------------------------------------------------------------------------------------------------------------------------------------------------------------------------------------------------------------------------------------------------------------------------------------------------------------------------------------------------------------------------------------------------------------------------------------------------------------------------------------------------------------------------------------------------------------------------------------------------------------------------------------------------------------------------------------------------------------------------------------------------------------------------------|
| Journal:                      | <i>BMJ Open</i>                                                                                                                                                                                                                                                                                                                                                                                                                                                                                                                                                                                                                                                                                                                                                                                    |
| Manuscript ID                 | bmjopen-2019-036568                                                                                                                                                                                                                                                                                                                                                                                                                                                                                                                                                                                                                                                                                                                                                                                |
| Article Type:                 | Protocol                                                                                                                                                                                                                                                                                                                                                                                                                                                                                                                                                                                                                                                                                                                                                                                           |
| Date Submitted by the Author: | 19-Dec-2019                                                                                                                                                                                                                                                                                                                                                                                                                                                                                                                                                                                                                                                                                                                                                                                        |
| Complete List of Authors:     | Lugg, Sebastian; University of Birmingham, Institute of Inflammation and Ageing<br>Kerr, Amy; University Hospitals Birmingham NHS Foundation Trust<br>Kadiri, Salma; University Hospitals Birmingham NHS Foundation Trust<br>Budacan, Alina; University Hospitals Birmingham NHS Foundation Trust<br>Farley, Amanda; University of Birmingham, Institute of Applied Health Research<br>Perski, Olga; University College London, Institute of Epidemiology & Health<br>West, Robert; University College London, Institute of Epidemiology & Health<br>Brown, Jamie; University College London, Institute of Epidemiology & Health<br>Thickett, David; University of Birmingham, Institute of Inflammation and Ageing<br>Naidu, Babu; University of Birmingham, Institute of Inflammation and Ageing |
| Keywords:                     | Cardiothoracic surgery < SURGERY, Adult thoracic medicine < THORACIC MEDICINE, Adult anaesthesia < ANAESTHETICS                                                                                                                                                                                                                                                                                                                                                                                                                                                                                                                                                                                                                                                                                    |
|                               |                                                                                                                                                                                                                                                                                                                                                                                                                                                                                                                                                                                                                                                                                                                                                                                                    |

SCHOLARONE™  
Manuscripts

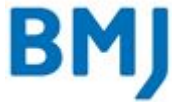

I, the Submitting Author has the right to grant and does grant on behalf of all authors of the Work (as defined in the below author licence), an exclusive licence and/or a non-exclusive licence for contributions from authors who are: i) UK Crown employees; ii) where BMJ has agreed a CC-BY licence shall apply, and/or iii) in accordance with the terms applicable for US Federal Government officers or employees acting as part of their official duties; on a worldwide, perpetual, irrevocable, royalty-free basis to BMJ Publishing Group Ltd ("BMJ") its licensees and where the relevant Journal is co-owned by BMJ to the co-owners of the Journal, to publish the Work in this journal and any other BMJ products and to exploit all rights, as set out in our [licence](#).

The Submitting Author accepts and understands that any supply made under these terms is made by BMJ to the Submitting Author unless you are acting as an employee on behalf of your employer or a postgraduate student of an affiliated institution which is paying any applicable article publishing charge ("APC") for Open Access articles. Where the Submitting Author wishes to make the Work available on an Open Access basis (and intends to pay the relevant APC), the terms of reuse of such Open Access shall be governed by a Creative Commons licence – details of these licences and which [Creative Commons](#) licence will apply to this Work are set out in our licence referred to above.

Other than as permitted in any relevant BMJ Author's Self Archiving Policies, I confirm this Work has not been accepted for publication elsewhere, is not being considered for publication elsewhere and does not duplicate material already published. I confirm all authors consent to publication of this Work and authorise the granting of this licence.

**TITLE****Protocol for a feasibility study of smoking cessation in the surgical pathway before major lung surgery: Project MURRAY**

Corresponding author:

Mr Babu Naidu

Institute of Inflammation and Ageing, College of Medical and Dental Sciences,

University of Birmingham, B15 2TT

b.naidu@bham.ac.uk

Tel: +44 (0)121 371 3228

**Sebastian T Lugg,<sup>1,2</sup> Amy Kerr,<sup>1</sup> Salma Kadiri,<sup>1</sup> Alina Budacan,<sup>1</sup> Amanda Farley,<sup>3</sup> Olga Perski,<sup>4</sup> Robert West,<sup>4</sup> Jamie Brown,<sup>4</sup> David Thickett,<sup>1</sup> Babu Naidu,<sup>1</sup> on behalf of the Project MURRAY Investigators**

1. Institute of Inflammation and Ageing, College of Medical and Dental Sciences, University of Birmingham, Birmingham, UK.
2. Department of Thoracic Surgery, Heartlands Hospital, University Hospitals Birmingham NHS Foundation Trust, Birmingham, UK.
3. Institute of Applied Health Research, University of Birmingham, UK.
4. Institute of Epidemiology and Health, University College London, UK.

**Keywords**

Thoracic surgery, smoking cessation intervention, perioperative medicine, postoperative pulmonary complication, clinical trial

**Word count 3998**

**ABSTRACT**

**Introduction:** Smoking prior to major thoracic surgery is the biggest risk factor for development of postoperative pulmonary complications, with 1 in 5 patients continuing to smoke before surgery. Current guidance is that all patients should stop smoking before elective surgery yet very few are offered specialist smoking cessation support. Patients would prefer support within the thoracic surgical pathway. No study has addressed the effectiveness of such an intervention in this setting on cessation. The overall aim is to determine in patients who undergo major elective thoracic surgery whether an intervention integrated (INT) into the surgical pathway improves smoking cessation rates compared with usual care (UC) of standard community/hospital based NHS smoking support. This pilot study will evaluate feasibility of a substantive trial.

**Methods and analysis:** Project MURRAY is a trial comparing the effectiveness of INT and UC on smoking cessation. INT is pharmacotherapy and a hybrid of behavioural support delivered by the trained healthcare practitioners (HCPs) in the thoracic surgical pathway and a complimentary web-based application. This pilot study will evaluate the feasibility of a substantive trial and study processes in 5 adult thoracic centres including the University Hospitals Birmingham NHS Foundation Trust. The primary objective is to establish the proportion of those eligible who agree to participate. Secondary objectives include evaluation of study processes. Analyses of feasibility and patient-reported outcomes will take the form of simple descriptive statistics and where appropriate, point estimates of effects sizes and associated 95% CIs.

**Ethics and dissemination:** The study has obtained ethical approval from NHS Research Ethics Committee (REC number 19/WM/0097). Dissemination plan includes: informing patients and HCPs; engaging multidisciplinary professionals to support a proposal of a definitive trial and submission for a full application dependent on the success of the study.

**Trial Registration Number:** NCT04190966; Pre-results

### Strengths and limitations of the study

- Smoking is common in patients undergoing major thoracic surgery and can result in significant economic and healthcare burden. Little is known about whether integrated smoking cessation support in the surgical pathway can improve smoking cessation rates.
- This study will assess the role of a hybrid model of integrated smoking cessation including both behavioral support and pharmacotherapy delivered by trained healthcare practitioners as well as use of a web-based application.
- This feasibility study will assess patient recruitment to inform a definitive study.
- Results from this study will add to the limited evidence towards of effective smoking cessation strategies in major thoracic surgery.
- This feasibility study will not answer the overarching research question of efficacy but will directly inform a well-designed definitive study

## INTRODUCTION

### Poorer outcomes for smokers in thoracic surgery

25,000 patients undergo major thoracic surgery every year in the UK (1). 1 in 5 patients smoke before surgery, which increases the risk of developing postoperative pulmonary complications including pneumonia and lung collapse. Just under half of smokers develop these complications with associated increased in-hospital mortality (0.5% to 12%), intensive therapy unit admissions (1.5% to 26%), increased hospital stay (5 to 14 days) and poorer long-term outcomes (2-4). Furthermore, lung cancer surgery patients have an 86% increased risk for cancer recurrence and two-fold decrease in 5-year survival compared with patients who quit smoking at diagnosis (5).

### The need for integrated hospital-based smoking cessation support

The current NICE guidance is that smokers undergoing 'elective' surgery should receive behavioural support and stop-smoking pharmacotherapy as early as possible in their outpatient or pre-operative assessments. This should be offered weekly, preferably face-to-face, for a minimum of 4 weeks after the quit date (6). The Cochrane review supporting this type of 'intensive' intervention (7) was based on two small trials in orthopaedics and general surgery (8, 9).

However in current practice most thoracic surgery patients do not receive any pre-operative smoking cessation support. Of the 120 patients attending a large UK thoracic regional unit only 40% of current smokers were offered support (10), similar to the proportion of all eligible pre-operative patients agreeing to participate in smoking cessation studies (11, 12). Only 1 in 3 smokers self-report abstinence at the time of lung cancer surgery (4), with biochemical verification indicating much lower quit rates (7).

Thus the current usual care (UC) of referral to stop-smoking services does not meet the standard set by NICE. This may be due to these services being designed to promote long-term quitting, which many smokers undergoing surgery may not be willing to commit to. Many patients also report that attending smoking cessation clinic appointments during their work-up for surgery is a significant barrier to stopping smoking and would prefer bespoke support during hospital visits (13).

1  
2  
3  
4  
5  
6  
7 In pre-operative smoking cessation studies, behavioural support is delivered either by  
8 research nurses or independent smoking cessation practitioners (12, 14). It is logical that  
9 HCPs in the surgical pathway could be trained to deliver the support due to the high  
10 prevalence of smoking within this patient group. This approach is advocated by both the  
11 Lung Cancer Nurse Forum and the Society of Cardiothoracic Surgery (UK) and evidence  
12 suggests that nurse delivered smoking cessation interventions are effective (18). Timely  
13 access is also crucial; NICE lung cancer guidelines recommend that surgery should not be  
14 delayed to give up smoking (15) and needs to be performed within 62 days of presentation  
15 and 31 days of diagnosis to avoid heavy financial penalties on individual Trusts (16).  
16 Therefore avoiding delays in receiving behavioural and pharmacological support is of  
17 paramount importance.  
18  
19  
20  
21  
22  
23  
24  
25

### 26 **Poor quality of available smoking cessation applications**

27  
28  
29 A combination of a web-based application (web app) with structured face-to-face behavioural  
30 support may aid successful quit attempts, whilst also supporting HCPs in delivering smoking  
31 cessation support throughout the surgical pathway. A recent review of over 100 smoking  
32 cessation apps showed that only 6 were deemed to be of high quality (17). There are no  
33 apps specifically designed for smoking cessation in patients undergoing major surgery and  
34 none designed to provide hybrid support alongside a trained smoking cessation practitioner.  
35  
36  
37  
38  
39

### 40 **Summary**

41  
42  
43  
44 Many patients who undergo thoracic surgery continue to smoke, and effective pre-operative  
45 smoking cessation interventions may improve outcomes. However, there are few studies  
46 exploring strategies for integrating smoking cessation into the patient pathway, which is a  
47 high priority area for research in these patients. We have developed a bespoke, tailored  
48 intense, integrated smoking cessation intervention to test in a 'real-life' clinical trial within the  
49 UK. The intervention involves pharmacotherapy and a hybrid of support delivered by trained  
50 HCPs in the thoracic surgical pathway and a complementary web app. Support may be  
51 particularly effective because of site of the surgery, the lungs, makes this a clear 'teachable  
52 moment' for patients (18, 19).  
53  
54  
55  
56  
57  
58  
59  
60



## Study aim

The overall aim of this research is to determine if integrated (INT) smoking cessation support in the surgical pathway improves smoking cessation rates in patients undergoing major elective thoracic surgery when compared with usual care (UC) of standard community/hospital based NHS smoking cessation support. To answer this research question with substantial evidence of the clinical and cost-effectiveness of INT approach, a multi-centre RCT is required. Feasibility studies are a recommended pre-requisite to assess feasibility of a large and expensive full-scale trial. We have therefore designed this multicentre feasibility study, which aims evaluate the feasibility of the INT by making the following quantitative and qualitative assessments.

## Objectives of the feasibility study

The aims of the feasibility study are to assess various aspects of the trial design and management and not to determine the relative effectiveness of INT versus UC.

## Primary Objective

To establish the proportion of those eligible who agree to participate in the study and receive the intervention.

## Secondary Objectives

1. Assess the integration of the intervention and trial procedures into the clinical pathway by benchmarking metrics such as time from decision to operate to study recruitment and to cessation, in addition to and period of cessation pre- and post-operatively and relationship with treatment target dates.
2. Explore barriers to study recruitment, including reasons for non-participation from screening logs and infrastructure issues from 'benchmarking metrics'.
3. To pilot and fine-tune study procedures and data capture forms.
4. To describe the proportion of patients in the INT group who have quit smoking by the day of and/or one month after surgery.
5. To describe the proportion of patients in the 'observation only' UC group who have quit smoking by the day of surgery and/or one month after surgery.

6. To define the spread and variability of smoking cessation practices in patients in the INT group and in the UC group including pharmacotherapy use as reported by the patient.
7. To understand patients' experiences of and engagement with the intervention, and any unintended consequences.
8. To establish whether the intervention is acceptable to thoracic surgery patients and staff and investigate recommendations for optimisation of intervention delivery.

## TRIAL DESIGN

### Design

Project Murray is an RCT comparing the effectiveness of INT verses UC in smoking cessation rates in patients undergoing major thoracic surgery, taking form of a stepped wedge cluster randomised controlled trial (20), and as such will not require individual patient randomisation. This feasibility study will evaluate the substantive trial and study processes.

### Setting

Trial recruitment will be over a period of 12 months with an additional 6-month follow-up period. Recruitment will initiate at the University Hospitals Birmingham NHS Foundation Trust, which is the trial co-ordinating site and performs >1000 major thoracic surgical procedures a year. Additional recruitment will involve 4 further regional thoracic surgical centres performing >400 major thoracic surgical procedures a year.

### Flow of participants during the trial

The anticipated pathway of patients through the trial is shown in the trial schema (Figure 1). All adult patients who fulfil the inclusion and exclusion criteria during the study period will be approached and participant information sheets (PIS) will be provided. Written informed consent will be obtained after an opportunity for patients to discuss requirements for the study. If the patient accepts the intervention, they will be placed into the INT group of the study. If they decline the intervention they will be invited to take part in the observational only part of the study and will receive usual care (UC). We will extract routinely collected pre- and post-operative data from patient's medical records and also collect data using questionnaires. Adverse events will be collected throughout the duration of the study. The summary of assessments is detailed in (Table 1).

## Study Eligibility

### Inclusion Criteria

- Current tobacco smoker (smoked within the last 28 days)
- Major Thoracic Surgery (including both open and minimally invasive approach)
- Able to provide written informed consent
- At least 1 weeks' time to surgery
- Age over 18 years

### Exclusion criteria

- Emergency thoracic surgery
- Inability to perform exhaled carbon monoxide (CO) measurements

### Patient Identification and screening procedure

Patients who are listed for major thoracic surgery will be identified and screened for eligibility prior to surgery. If a patient is screened and not eligible for the study or does not consent to be in the intervention or observation group, a record of the case will be kept in the screening log and will inform recruitment targets. No further information will be collected on ineligible patients or those that have not given consent for participation in the study.

### Patient Recruitment

The PIS, developed with feedback from our Patient and Public Involvement (PPI) representatives, will be sent to the patient before the initial consultation, allowing time for the patient to review and ask questions. As part of the normal consultation process, the HCP will deliver a brief intervention detailing the importance of smoking cessation as per standard clinical practise (National Centre for Smoking Cessation Training [NCSCT] - Ask, Advice, Act). Patients will then be asked to consider and consent to a trial testing the new bespoke integrated smoking cessation support delivered in secondary care by the surgical/nursing team. If a patient does not wish to enter the INT arm they will be approached to take part in the UC arm of the study.

1  
2  
3 If patients want to join the trial on the day of the clinic appointment, they can do so, as the  
4 intervention is low risk and aimed at being offered 'there and then'. A research team member  
5 will obtain written informed consent with delegated authority from the Principal Investigator.  
6 A copy of the signed consent form will be given to the participants and a copy will be placed  
7 in the medical notes. The original consent form will be stored in the investigators site file.  
8 Consent will be sought at every study contact and participants will be made aware that they  
9 are free to withdraw consent at any time without reprisal. Participants will be consented to  
10 inform their GP of their involvement in the study.  
11  
12  
13  
14  
15  
16

### 17 **Intervention development**

18  
19  
20 A smoking cessation package has been developed using best practice from NICE/NCSCCT  
21 involving pharmacotherapy and a hybrid of behavioural support delivered by trained HCPs in  
22 the thoracic surgical pathway and a complementary web app. 'Quit4Surgery' is a web app  
23 created using a user centred design approach and developed through a series of design  
24 workshops with patients, HCPs, academic researchers with expertise in smoking cessation  
25 and informed by behavioural frameworks/motivation theory. The iterative development was  
26 handled with 'Agile' and SCRUM project management (21, 22). 'Quit4Surgery' contains  
27 behaviour change techniques that research suggests can improve the chances of quitting,  
28 including goal setting, self-monitoring, feedback, rewards, information about health  
29 consequences, advice on medication use, advice on changing routines, advice on coping  
30 and support for identity change (23). 'Quit4Surgery' also enables HCPs to record and enter  
31 patients' CO levels.  
32  
33  
34  
35  
36  
37  
38  
39  
40

### 41 **Integration of full package of support into the surgical pathway (INT)**

42  
43  
44 1) INT will be delivered by key HCPs in the surgical pathway (i.e. surgical nurses, lung  
45 cancer nurses, or pre-operative assessment nurses) who have received the NCSCCT training  
46 to deliver behavioural support required for stop smoking practitioners with specific focus on  
47 major surgical patients (24). The initial consultation of 15-30 minutes will occur either on the  
48 day of consent or at the earliest convenience for the patient. This will be in a private room  
49 and will outline the benefits of stopping smoking before thoracic surgery, discuss  
50 pharmacotherapy options, provide behavioural support (25-28), decide on an early quit date  
51 (aim within 48 hours of consent) and provide further information regarding 'Quit4Surgery'.  
52 The HCP will validate and quantify smoking amount using CO measurements, which will be  
53 repeated at subsequent face-to-face interactions, providing biofeedback upon the success of  
54 smoking cessation to the patient.  
55  
56  
57  
58  
59  
60

1  
2  
3  
4  
5 2) Pharmacotherapy is encouraged for all patients and includes either combined short- and  
6 long-acting nicotine replacement therapy (NRT) or varenicline, which are provided as  
7 standard care within the NHS. Patients wishing to use e-cigarettes will be given advice as  
8 per the NCSCT guidance (29). Treatment will be maintained for the peri-operative period to  
9 offset nicotine withdrawal symptoms and is typically 8-12 weeks for NRT and 12 weeks for  
10 varenicline as per NCSCT guidance, with pharmacotherapy and behavioural support tailored  
11 appropriately to individual patients.  
12  
13  
14  
15

16  
17 3) 'Quit4Surgery' will collect feedback regarding the patient's engagement, cravings and  
18 abstinence and provide motivational feedback to support the patient. The motivational  
19 feedback provided by the web app is guided by established behavioural change theory and  
20 will complement the patients smoking cessation package. Patient feedback using the web  
21 app to the surgical team will guide them as to the need for additional contact if the patient  
22 wishes. This will help improve overall efficacy of the intervention.  
23  
24  
25  
26  
27

28 INT patients will receive proactive support within 2 days of the quit date (in person or by  
29 telephone) and then weekly until one month after surgery. The weekly sessions will  
30 concentrate on facilitators and barriers to quitting, relapse, pharmacotherapy side effects  
31 and withdrawal symptoms. Face-to-face interactions will occur during the surgical outpatient  
32 appointments, pre-clerking clinic and during hospital admission to reduce the number of  
33 additional visits. Thus the INT will fit into the 'referral to treatment' target time frame and  
34 ensuring surgery is not delayed as recommended by NICE.  
35  
36  
37  
38  
39  
40

#### 41 **Control group of usual care (UC)**

42  
43  
44

45 Termed usual care (UC), per usual local practice, patients are typically given a leaflet about  
46 the benefits of smoking cessation and referred to their local NHS smoking cessation service,  
47 which typically last up to 12 weeks and include pharmacotherapy. Both groups will receive  
48 the same pre-, peri- and post-operative care as per protocol.  
49  
50  
51

#### 52 **Withdrawal from the Trial**

53  
54  
55  
56

57 Withdrawal from the trial before surgery is a decision of the participant. However participants  
58 will be asked if the research team can still use the data collected during their participation in  
59 the research analyses.  
60

## Protocol Deviations

All study and protocol deviations will be documented in the patients CRF and reported to the Principle Investigator, who will notify the Sponsor of any serious breaches. Patients will be analysed according to group allocation, by intent-to-treat analysis.

## Patient and Public Involvement

The project details were discussed at a national thoracic surgery patient group (RESOLVE) meeting and feedback regarding merit and acceptability of the proposed intervention were incorporated. Dissemination of results will occur via specific patient feedback events. A patient representative was an active contributor to the development of the trial and intervention and will be a member of the trial management group. The intervention including the web app 'Quit4Surgery' were designed to meet patients' specific 'needs' and 'drivers' of smokers who are waiting for thoracic surgery, with a PPI group involved in the design and initial product testing stages of this feasibility study.

## OUTCOME AND DATA COLLECTION

### Patient Recruitment into study

The overall aims of the feasibility are to find out if a larger trial is feasible. The quantitative measurements related to this include:

- Proportion of all elective thoracic procedures screened
- Proportion of eligible participants of those screened
- Proportion of eligible participants consented to receive intervention

In this feasibility study, selecting 5 units whose overall elective thoracic patient through-put amounts to 4000 patients a year, of whom 20% are smokers and 20% agree to take part in the study. It is expected that 60 eligible patients will be recruited to the INT group and 60 patients to the UC group of the study. Therefore the aim is to recruit 5 patients a month to each group over the 12 months recruitment period across all sites.

### Patient Identification and Screening

1  
2  
3 The proportion of patients screened for eligibility and recorded on a screening log will be  
4 assessed and reported as the proportion of patients screened from the total number of  
5 planned major thoracic surgery during the study period.  
6  
7

### 8 9 **Reasons for Failure to be Recruited**

10  
11  
12  
13 The proportion of patients that were missed, which should be minimal and proportion of  
14 patients who decline to take part will be recorded. Patients decline participation for many  
15 reasons, which should be captured whenever possible.  
16  
17

### 18 19 **Education Material of Nurses and Surgeons**

20  
21  
22  
23 Feedback on the appropriateness, value and acceptability of the training will be elicited to  
24 enable refinement of the training programme for the substantive study, and to define a  
25 minimum competence. The training material will be evaluated for its ease of use, should it be  
26 used in the substantive study.  
27  
28

### 29 30 **Assessment of Data Collection Process**

31  
32  
33  
34 Data will be collected using a CRF and will include demographic information and co-  
35 morbidities. Postoperative complications will be defined by the European Society of Thoracic  
36 Surgery (ESTS) (30), Thoracic Morbidity and Mortality (TM&M) system (31) and the stEP-  
37 COMPAC Group (32); see online supplementary appendix for definitions. Hospital re-  
38 admission rate will be determined within 30 days of discharge.  
39  
40  
41

42  
43  
44 Assessment and identification will be made for loss of data during in-hospital stay to improve  
45 the data collection process for the substantive trial.  
46  
47

### 48 49 **Smoking-related Outcomes**

50  
51  
52 In the study the feasibility of the following questionnaires will be tested:

- 53 • Self-reported quit rate and exhaled CO measurement
- 54 • Fagerstrom Test for Nicotine Dependency: assessment of nicotine addiction (33).
- 55 • Mood and Physical Symptoms Scale (MPSS): assessment of cigarette withdrawal  
56 symptoms over the past 24 hours, including the strength of urge to smoke (34).  
57  
58  
59  
60



- Generic health related quality of life (EQ-5D-5L): assessment to provide a preference-based measure of health-related quality-of-life (35).
- NRT and support usage questionnaire.
- Health resource usage questionnaire: assessment of resource will be assessed via patient-recall with resources being measured including planned hospital overnight stays, planned hospital out-patient visits, hospital emergency visits, hospital admissions, GP and other community service visits.

### **Acceptability to and Impact on Patients**

All patients consenting to participate in the trial will be eligible for interview and selected using maximum variety sampling by age, sex, ethnicity, admitting diagnosis, surgical procedure and smoking status. Interviews will be conducted until saturation is achieved, which is likely to be around 25-30 patients across all sites (36). Telephone interviews will be conducted as to minimise impact to patients following major surgery, will last no longer than 60 minutes and will be audio recorded and transcribed by the researcher.

An interview guide will be developed using evidence from previous experience of running the rehabilitation and pain study, and based on the interview objectives: pre- and post-surgical experiences of patients receiving the intervention (including effectiveness of staff communication) and patient engagement with it, any unintended consequences, acceptability of the intervention to patients, and recommendations for how its use or content/design could be improved.

### **Assessment of Trial Processes and Impact on Staff**

Key HCPs in the clinical pathway will be invited to attend a focus group or individual interviews that will explore both the acceptability and recommendations for optimisation of the intervention.

Digitally recorded interviews and focus groups will be transcribed verbatim and anonymised. Transcripts will be analysed for patients and staff separately following Braun and Clarke's method for thematic analysis. Analysis will take an iterative approach, where data collection and analysis occurs concurrently, allowing the topic guide to be modified throughout to reflect emergent and/or priority themes.



## STATISTICS AND DATA COLLECTION

### Sample Size Calculation

As this is a feasibility study no formal sample size calculation has been performed. An audit discussing sample size in pilot and feasibility studies concluded that while sample size justification is important, formal calculation may not be appropriate. The findings from the audit concluded that a median size of 30 in each arm is appropriate (37). The study will aim to enrol 60 participants in the intervention over 1 year as this is a sufficient number to estimate a proportion of patients who have quit smoking by the day of surgery (38), as well as to explore data collection processes, and inform sample size calculations for a potential larger trial. 60 participants will allow us to measure recruitment and compliance rates with 95% confidence interval (CI) width between 10 and 20%. It would also be enough to estimate the standard deviation (SD) of questionnaires with reasonable accuracy for future planning of a larger trial.

### Data Analysis

Appropriate summary statistics (e.g. proportions and inter-quartile ranges, means and SDs) will be generated for the study feasibility and patient/clinical measures. Between-group measures (mean differences, etc.) will be generated alongside 95% CI, however formal hypothesis testing will not be carried out as the aim here is not to conclusively prove efficacy and furthermore the size of sample is too small for any inferential tests to be meaningful. Participants will be kept in the groups they were allocated, regardless of compliance with treatment (intention-to-treat protecting against attrition bias). Analysis will be completed once all participants have completed all follow-up assessments. All data used in publication will be in an anonymous format in order to maintain patient study participation confidential.

### Handling Missing Data

A member of the research team will contact patients for any missing data (e.g. questionnaires) via telephone and post. Where patients attend for follow-up clinic, the potential for missing data will again be limited. Imputation of missing responses is not proposed for patient reported outcomes as this is not a definitive trial and no hypothesis testing will be performed.

## **DATA MANAGEMENT AND QUALITY ASSURANCE**

### **Data management and confidentiality**

Personal data will be collected from trial participants and hospital notes on CRFs, coded with the participant's unique trial number and initials. This will be held securely and strictly confidentially according to NHS policies. Patients in the semi-structured qualitative interviews will be consented specifically for their name, address and contact telephone number to be shared with University of Birmingham (UoB) and University College London. Data will be transferred securely by encrypted end-to-end email and will not be labelled with private identifiable information. Interview response information will be kept encrypted on a computer in a locked office. No data that could be used to identify an individual will be published. Data will be stored on a secure server under the provisions of the Data Protection Act and/or applicable laws and regulations. Data may be accessed by external regulatory agencies and the Study Sponsor representatives and permission for this access will be documented within the participants consent form.

### **Monitoring and Audit**

Onsite monitoring will be conducted as required by the UoB Clinical Research Compliance Team, with activities reported to the trials team and any issues noted followed-up to resolution. Additional on-site monitoring visits may be triggered, e.g. by poor CRF return, poor data quality, low AE reporting rates, excessive number of participant withdrawals/deviations. Study data and evidence of monitoring and systems audits will be made available for inspection by the regulatory authority as required.

### **Long Term Storage of Data**

Trial data will be stored archived after the formal closure of the trial in accordance with archive policy and for the appropriate duration as per current legislation.

### **Data access**

Upon completion and publication of the study, individual participant data will be shared that underlie the results reported in study after de-identification. Additional related documents will

1  
2  
3 be available including the study protocol, statistical analysis plan an analytical code. This  
4 data will be available in the beginning 3 months and 5 years following article publication to  
5 those who provide a methodologically sound proposal for analysis to achieve the aims in the  
6 approved proposal. All proposals should be directed to [b.naidu@bham.ac.uk](mailto:b.naidu@bham.ac.uk). To gain  
7 access requestors will need to sign a data access agreement. Data will be available for 5  
8 years at a third party website.  
9  
10  
11  
12

### 13 14 **SPONSORSHIP AND INDEMNITY**

15  
16  
17 The UoB will act as the sponsor for this study. Delegated responsibilities will be assigned to  
18 the Chief Investigator and the NHS Trusts involved in the study. The UoB has in force a  
19 Public Liability Policy and/or Clinical Trials policy which provides cover for claims for  
20 'negligent harm' and the activities here are included within that coverage.  
21  
22  
23

### 24 25 **REGULATORY APPROVALS**

26  
27  
28 This study has obtained ethical approval from the NHS West Midlands Black Country  
29 Research Ethics Committee (Protocol Version 2.1; REC number 19/WM/0097).  
30  
31  
32

### 33 34 **STUDY DISSEMINATION**

35  
36  
37 This aim of this feasibility study is to inform a substantive trial. On completion, results will be  
38 published in a peer-review scientific journal. The feasibility study is registered on the clinical  
39 trial database (NCT04190966).  
40  
41  
42

43 Author Contributions: All authors have made substantial contributions to the conception or  
44 design of the work, or acquisition, analysis or interpretation of the data. STL has been  
45 participated in the study design, intervention development and drafted the manuscript. SK,  
46 AK and AB have participated in the intervention development. AF, OP, JB, RW, DRT, and  
47 BN have participated in the study design, intervention development and have critically  
48 revised the manuscript. All authors have approved the final version.  
49  
50  
51  
52

53  
54 Funding: The research costs of the trial are funded by a grant from Johnson and Johnson  
55

56  
57 Competing Interests: None declared  
58

59  
60 Ethics approval: NHS Research Ethics Committee (REC number 19/WM/0097)

## REFERENCES

1. 2017 [Available from: [https://scts.org/wp-content/uploads/2017/04/National-2014-15-returns-for-SCTS\\_org-corrected-11-04-2017.xlsx](https://scts.org/wp-content/uploads/2017/04/National-2014-15-returns-for-SCTS_org-corrected-11-04-2017.xlsx).
2. Agostini P, Lugg ST, Adams K, Vartsaba N, Kalkat MS, Rajesh PB, et al. Postoperative pulmonary complications and rehabilitation requirements following lobectomy: a propensity score matched study of patients undergoing video-assisted thoracoscopic surgery versus thoracotomy. *Interactive cardiovascular and thoracic surgery*. 2017;24(6):931-7.
3. Agostini P, Cieslik H, Rathinam S, Bishay E, Kalkat MS, Rajesh PB, et al. Postoperative pulmonary complications following thoracic surgery: are there any modifiable risk factors? *Thorax*. 2010;65(9):815-8.
4. Lugg ST, Tikka T, Agostini PJ, Kerr A, Adams K, Kalkat MS, et al. Smoking and timing of cessation on postoperative pulmonary complications after curative-intent lung cancer surgery. *Journal of cardiothoracic surgery*. 2017;12(1):52.
5. Parsons A, Daley A, Begh R, Aveyard P. Influence of smoking cessation after diagnosis of early stage lung cancer on prognosis: systematic review of observational studies with meta-analysis. *BMJ (Clinical research ed)*. 2010;340:b5569.
6. NICE Guidance smoking cessation in secondary care acute maternity and mental health services.
7. Thomsen T, Villebro N, Moller AM. Interventions for preoperative smoking cessation. *The Cochrane database of systematic reviews*. 2014(3):Cd002294.
8. Moller AM, Villebro N, Pedersen T, Tonnesen H. Effect of preoperative smoking intervention on postoperative complications: a randomised clinical trial. *Lancet (London, England)*. 2002;359(9301):114-7.
9. Lindstrom D, Sadr Azodi O, Wladis A, Tonnesen H, Linder S, Nasell H, et al. Effects of a perioperative smoking cessation intervention on postoperative complications: a randomized trial. *Ann Surg*. 2008;248(5):739-45.
10. Webb J KA, Thickett D, Naidu B. Smoking habits of pre-surgery patients. *European Respiratory Journal*. 2015;46: PA2511.
11. Warner DO, Klesges RC, Dale LC, Offord KP, Schroeder DR, Vickers KS, et al. Telephone quitlines to help surgical patients quit smoking patient and provider attitudes. *American journal of preventive medicine*. 2008;35(6 Suppl):S486-93.
12. Lee SM, Landry J, Jones PM, Buhrmann O, Morley-Forster P. Long-term quit rates after a perioperative smoking cessation randomized controlled trial. *Anesthesia and analgesia*. 2015;120(3):582-7.
13. Farley A, Aveyard P, Kerr A, Naidu B, Dowswell G. Surgical lung cancer patients' views about smoking and support to quit after diagnosis: a qualitative study. *Journal of cancer survivorship : research and practice*. 2016;10(2):312-9.
14. Park ER, Japuntich S, Temel J, Lanuti M, Pandiscio J, Hilgenberg J, et al. A smoking cessation intervention for thoracic surgery and oncology clinics: a pilot trial. *Journal of thoracic oncology : official publication of the International Association for the Study of Lung Cancer*. 2011;6(6):1059-65.
15. NICE. Lung cancer: diagnosis and management. NICE guideline [CG121] 2011 [Available from: <https://www.nice.org.uk/guidance/CG121>].
16. National Cancer Waiting Times Monitoring Dataset Guidance – Version 9.0. 2015.
17. Thornton L, Quinn C, Birrell L, Guillaumier A, Shaw B, Forbes E, et al. Free smoking cessation mobile apps available in Australia: a quality review and content analysis. *Australian and New Zealand journal of public health*. 2017;41(6):625-30.
18. McBride CM, Ostroff JS. Teachable moments for promoting smoking cessation: the context of cancer care and survivorship. *Cancer control : journal of the Moffitt Cancer Center*. 2003;10(4):325-33.

19. Shi Y, Warner DO. Surgery as a teachable moment for smoking cessation. *Anesthesiology*. 2010;112(1):102-7.
20. Hemming K, Haines TP, Chilton PJ, Girling AJ, Lilford RJ. The stepped wedge cluster randomised trial: rationale, design, analysis, and reporting. *BMJ (Clinical research ed)*. 2015;350:h391.
21. What is Scrum? An Agile Framework for Completing Complex Projects - Scrum Alliance. Scrum Alliance.2016.
22. A M. Strategy, Implementation, Organisation and People. Springer Verlag2015.
23. Michie S, Hyder N, Walia A, West R. Development of a taxonomy of behaviour change techniques used in individual behavioural support for smoking cessation. *Addict Behav*. 2011;36(4):315-9.
24. Standard Treatment Programme 2012 [Available from: <http://www.ncsct.co.uk/usr/pub/NCSCCT%20STP.pdf>].
25. West R, Sohal T. "Catastrophic" pathways to smoking cessation: findings from national survey. *BMJ (Clinical research ed)*. 2006;332(7539):458-60.
26. Ong KC, Cheong GN, Prabhakaran L, Earnest A. Predictors of success in smoking cessation among hospitalized patients. *Respirology (Carlton, Vic)*. 2005;10(1):63-9.
27. Sivarajan Froelicher ES, Miller NH, Christopherson DJ, Martin K, Parker KM, Amonetti M, et al. High rates of sustained smoking cessation in women hospitalized with cardiovascular disease: the Women's Initiative for Nonsmoking (WINS). *Circulation*. 2004;109(5):587-93.
28. BTS Recommendations for smoking cessation services.
29. NCSCT. Electronic Cigarettes - A briefing for stop smoking services. 2016.
30. (ESTS) ESoTS. Database report silver book 2015. Available online: . 2015.
31. Seely AJ, Ivanovic J, Threader J, Al-Hussaini A, Al-Shehab D, Ramsay T, et al. Systematic classification of morbidity and mortality after thoracic surgery. *The Annals of thoracic surgery*. 2010;90(3):936-42; discussion 42.
32. Abbott TEF, Fowler AJ, Pelosi P, Gama de Abreu M, Moller AM, Canet J, et al. A systematic review and consensus definitions for standardised end-points in perioperative medicine: pulmonary complications. *British journal of anaesthesia*. 2018;120(5):1066-79.
33. Heatherton TF, Kozlowski LT, Frecker RC, Fagerstrom KO. The Fagerstrom Test for Nicotine Dependence: a revision of the Fagerstrom Tolerance Questionnaire. *British journal of addiction*. 1991;86(9):1119-27.
34. West R, Hajek P. Evaluation of the mood and physical symptoms scale (MPSS) to assess cigarette withdrawal. *Psychopharmacology*. 2004;177(1-2):195-9.
35. EuroQol--a new facility for the measurement of health-related quality of life. *Health policy (Amsterdam, Netherlands)*. 1990;16(3):199-208.
36. Morse JM. Analytic Strategies and Sample Size. *Qualitative health research*. 2015;25(10):1317-8.
37. Billingham SA, Whitehead AL, Julious SA. An audit of sample sizes for pilot and feasibility trials being undertaken in the United Kingdom registered in the United Kingdom Clinical Research Network database. *BMC medical research methodology*. 2013;13:104.
38. Browne RH. On the use of a pilot sample for sample size determination. *Statistics in medicine*. 1995;14(17):1933-40.

**Table 1 Summary of investigations and assessments**

|                                                     | Participants             |                       | Time points                      |                |                      |                           |                         |                            |
|-----------------------------------------------------|--------------------------|-----------------------|----------------------------------|----------------|----------------------|---------------------------|-------------------------|----------------------------|
|                                                     | Intervention Group (INT) | Usual Care Group (UC) | Baseline clinic prior to surgery | Day of surgery | During hospital Stay | Day of hospital discharge | One month after surgery | Six months after enrolment |
| Eligibility and written informed consent            | X                        | X                     | X                                |                |                      |                           |                         |                            |
| Demographic Data <sup>1</sup>                       | X                        | X                     | X                                |                |                      |                           |                         |                            |
| Previous Medical History <sup>2</sup>               | X                        | X                     | X                                |                |                      |                           |                         |                            |
| Self-reported Quit rate                             | X                        | X                     | X                                | X              |                      | X                         | X                       | X                          |
| Exhaled CO measurement                              | X                        | X                     | X                                | X              |                      | X                         | X                       | X                          |
| NRT and support usage questionnaire                 | X                        | X                     | X                                | X              |                      | X                         | X                       | X                          |
| Fagerstrom Test for Nicotine Dependence             | X                        | X                     | X                                |                |                      |                           | X                       |                            |
| Mood and Physical Symptoms Scale                    | X                        |                       | X                                | X              |                      | X                         | X                       |                            |
| EQ-5D-5L                                            | X                        |                       | X                                |                |                      |                           | X                       |                            |
| Health resource usage questionnaire                 | X                        |                       |                                  |                |                      |                           | X                       |                            |
| Surgery and anesthetic data <sup>3</sup>            | X                        | X                     |                                  | X              |                      |                           |                         |                            |
| Postoperative complications <sup>4,5</sup>          | X                        | X                     |                                  |                | X                    | X                         | X                       |                            |
| Hospital readmission <sup>6</sup>                   | X                        | X                     |                                  |                |                      |                           | X                       |                            |
| Semi structured qualitative interviews <sup>7</sup> | X                        | X                     |                                  |                |                      |                           | X                       |                            |
| Adverse events                                      | <i>If applicable</i>     |                       |                                  |                |                      |                           |                         |                            |
| Protocol deviations                                 | <i>If applicable</i>     |                       |                                  |                |                      |                           |                         |                            |

- 1) Demographic data: gender, age, indication for surgery, height, weight, BMI, ASA grade, ECOG score, dyspnoea score, recent lung function
- 2) Previous medical history: smoking history, alcohol intake per week, co-morbidities (COPD, Ischaemic Heart Disease, Congestive Cardiac Failure, Hypertension, diabetes (diet-controlled/ oral therapy/ insulin), renal failure, previous stroke, thyroid disease (hyperthyroid/ hypothyroid).
- 3) Anaesthetic technique data: PCA, Epidural, Paravertebral and morphine infusion, overall fluid balance, blood loss, operation performed (side of surgery, operation, surgical technique).
- 4) **Post-operative data and observations:** Routine blood results if done (full blood count, albumin, renal function, electrolytes, CRP)  
**Acute complications:** According to ESTS (30) (Appendix A) and Thoracic Morbidity and Mortality Classification (31) (Appendix B), data also collected including admission and

length of stay on the ward (0), step-down (1), the HDU (2) and ITU (3). Data will also be collected in patients requiring mini-tracheostomy or additional surgery.

**Post-operative pulmonary complications:** Using stEP-COMPAC Group definition of postoperative pulmonary complications (32) (Appendix C) defining atelectasis (detected on computer tomography/CXR), pneumonia (using US Centres for Disease Control criteria), acute respiratory distress syndrome (using Berlin Consensus), and pulmonary aspiration (clear clinical history and radiological evidence).

- 5) Discharge data: total hospital stay, home with flutter bag, histology data and mortality.
- 6) Follow-up: hospital readmission up to and including one month following surgery.
- 7) At 4-8 weeks post-surgery patients will also have semi-structured qualitative patient interviews will be undertaken at 4 weeks post discharge to investigate experience, engagement, acceptability, unintended consequences/benefits and how to optimise the intervention delivery.



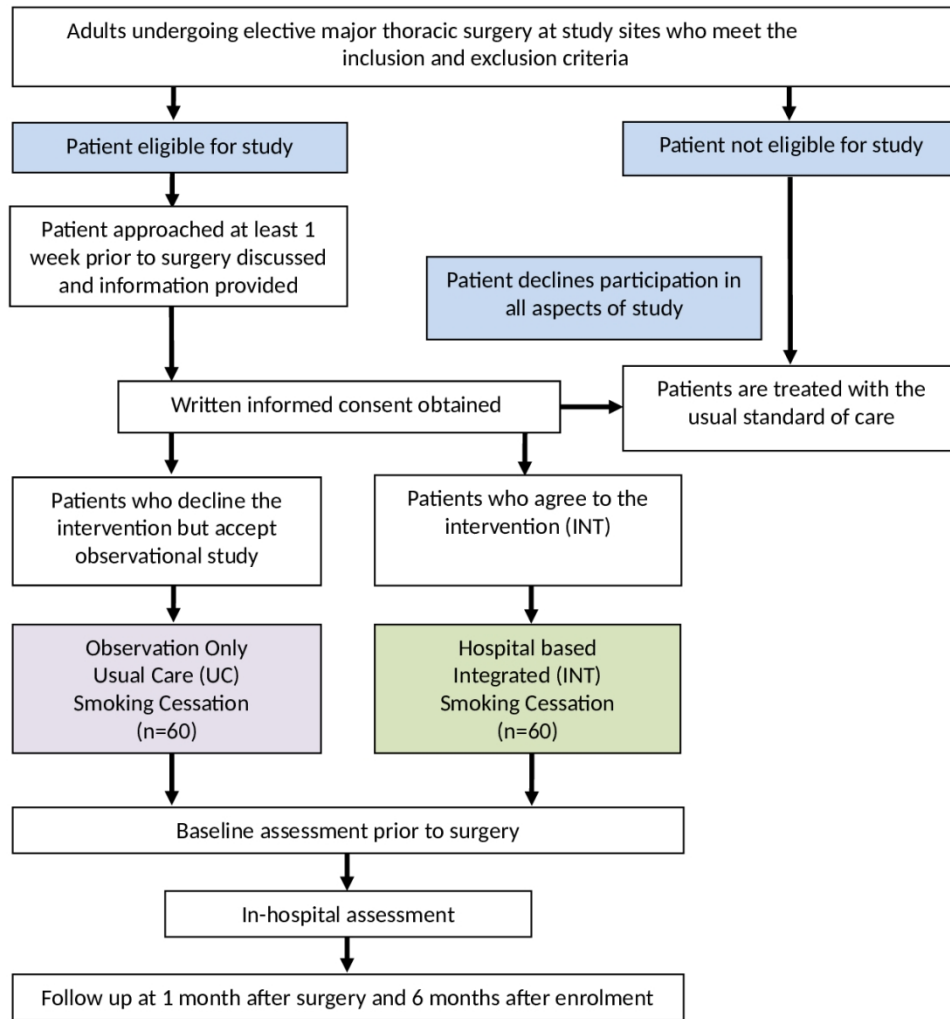

Trial Schema

168x179mm (200 x 200 DPI)



## APPENDIX

### Appendix A – Major cardiopulmonary complications as classified by the European Society of Thoracic Surgeons (ESTS)

**ARDS:** Adult respiratory distress syndrome defined according to the American-European consensus conference. All of the following criteria should be met:

1. Acute onset
2. Arterial hypoxemia with PaO<sub>2</sub>/FIO<sub>2</sub> ratio lower than 200 (regardless PEEP level)
3. Bilateral infiltrates at chest radiograph or CT scan
4. No clinical evidence of left atrial hypertension or pulmonary artery occlusive pressure <18 mmHg
5. Compatible risk factors

**Atrial Arrhythmia:** new onset of atrial fibrillation/flutter (AF) requiring medical treatment or cardioversion. Does not include recurrence of AF which had been present preoperatively.

**Ventricular Arrhythmia:** sustained ventricular tachycardia or ventricular fibrillation that has been clinically documented and treated by ablation therapy, implantable cardioverter defibrillator, permanent pacemaker, pharmacologic treatment or cardioversion.

**Bronchoscopy for atelectasis:** postoperative atelectasis documented clinically or radiographically that needed bronchoscopy.

**Pneumonia:** defined according to the last CDC criteria. Two or more serial chest radiographs with at least **one** of the following:

- New or progressive and persistent infiltrate
- Consolidation
- Cavitation

**AND** at least **one** of the following:

- Fever (>38°C or >100.4°F) with no other recognized cause
- Leukopenia (<4000 WBC/mm<sup>3</sup>) or leukocytosis (>12,000 WBC/mm<sup>3</sup>)
- For adults >70 years old, altered mental status with no other recognized cause

**AND** at least **two** of the following:

- New onset of purulent sputum, or change in character of sputum, or increased respiratory secretions, or increased suctioning requirements

- 1  
2  
3  
4  
5  
6  
7  
8  
9
- New onset or worsening cough, or dyspnea, or tachypnea
  - Rales or bronchial breath sounds Worsening gas exchange (e.g. O<sub>2</sub> desaturations (e.g., PaO<sub>2</sub>/FiO<sub>2</sub> < 240), increased oxygen requirements, or increased ventilator demand).

10  
11  
12  
13  
14  
15  
16  
17  
18

**Pulmonary embolism:** confirmed by V/Q scan, angiogram or CT scan.

19  
20  
21  
22  
23  
24  
25  
26  
27  
28  
29  
30  
31  
32  
33  
34  
35  
36  
37  
38

**DVT:** deep venous thrombosis confirmed by Doppler study, contrast study or other study and that required treatment.

39  
40  
41  
42  
43  
44  
45  
46  
47  
48  
49  
50  
51  
52  
53  
54  
55  
56  
57  
58  
59  
60

**Myocardial infarct:** evidenced by one of the following criteria:

1. Transmural infarction diagnosed by the appearance of a new Q wave in two or more contiguous leads on ECG.
2. Subendocardial infarction (non Q wave) evidenced by clinical, angiographic electrocardiographic signs.
3. Laboratory isoenzyme evidence of myocardial necrosis.

**Renal failure:** defined as the onset of new renal failure in the postoperative period according to one of the following criteria:

1. Increase of serum creatinine to greater than 2.0, and 2-fold the preoperative creatinine level.
2. A new requirement for dialysis postoperatively.

**Neurological complication:** occurrence of one of the following central neurologic postoperative events not present preoperatively:

1. A central neurologic deficit persisting postoperatively for more than 72 hours
2. A transient neurologic deficit (transient ischemic attack or reversible ischemic neurological deficit) with recovery within 72 hours
3. A new postoperative coma persisting at least 24 hours and caused by anoxic/ischemic and/or metabolic encephalopathy, thromboembolic event or cerebral bleed

## Appendix B – Seeley Systematic Classification of Morbidity and Mortality After Thoracic Surgery (TM &M) Classification of Severity

Complication: Any deviation from the normal postoperative course.

| <b>Minor</b>     |                                                                                                 |
|------------------|-------------------------------------------------------------------------------------------------|
| Grade I          | Any complication without need for pharmacologic treatment or other intervention.                |
| Grade II         | Any complication that requires pharmacologic treatment or minor intervention only.              |
| <b>Major</b>     |                                                                                                 |
| Grade III        | Any complication that requires surgical, radiologic, endoscopic intervention, or multi-therapy. |
| Grade IIIa       | Intervention does not require general anaesthesia.                                              |
| Grade IIIb       | Intervention requires general anaesthesia.                                                      |
| Grade IV         | Any complication requiring intensive care unit management and life support.                     |
| Grade IVa        | Single organ dysfunction.                                                                       |
| Grade IVb        | Multi-organ dysfunction.                                                                        |
| <b>Mortality</b> |                                                                                                 |
| Grade V          | Any complication leading to the death of the patient.                                           |

## Appendix C – StEP Core Outcome Measures in Perioperative and Anaesthetic Care (COMPAC) – Post-operative Pulmonary Complications

### Post-operative Pulmonary Complications\*

Composite of respiratory diagnoses that share common pathophysiological mechanisms including pulmonary collapse and airway contamination:

- (i) atelectasis detected on computed tomography or chest radiograph,
- (ii) pneumonia using US Centers for Disease Control criteria,
- (iii) Acute Respiratory Distress Syndrome using Berlin consensus definition,
- (iv) pulmonary aspiration (clear clinical history **AND** radiological evidence).

### \*Exclusions

Other diagnoses that do not share a common biological mechanism are best evaluated separately and only when clearly relevant to the treatment under investigation:

- (i) pulmonary embolism,
- (ii) pleural effusion,
- (iii) cardiogenic pulmonary oedema,
- (iv) pneumothorax,
- (v) bronchospasm.

### ARDS - Berlin definition

Timing: within 1 week of a known clinical insult or new or worsening respiratory symptoms  
**AND** Chest imaging: bilateral opacities not fully explained by effusions, lobar/lung collapse or nodules

**AND** Origin of oedema: respiratory failure not fully explained by cardiac failure or fluid overload (requires objective assessment, e.g. echocardiography, to exclude hydrostatic oedema),

**AND** Oxygenation:

Mild  $\text{PaO}_2:\text{FiO}_2$  between 26.7 - 40.0 kPa (200-300 mm Hg) with PEEP or CPAP  $\geq$  5 cm  $\text{H}_2\text{O}$ ;

Moderate  $\text{PaO}_2:\text{FiO}_2$  between 13.3 - 26.6 kPa (100-200 mm Hg) with PEEP  $\geq$  5 cm  $\text{H}_2\text{O}$ ;

Severe  $\text{PaO}_2:\text{FiO}_2 \leq$  13.3 kPa (100 mm Hg) with PEEP  $\geq$  5 cm  $\text{H}_2\text{O}$ .

### Mechanical ventilation:

The need for need for tracheal re-intubation and mechanical ventilation after extubation, and within 30 days after surgery OR mechanical ventilation for more than 24 h after surgery. The inclusion of non-invasive ventilation may be considered on a study-by-study basis.

## Post-operative Pneumonia

Two or more serial chest radiographs with at least one of the following (one radiograph is sufficient for patients with no underlying pulmonary or cardiac disease):

- (i) New or progressive and persistent infiltrates,
- (ii) consolidation
- (iii) cavitation;

**AND** at least **one** of the following:

- (a) fever ( $>38^{\circ}\text{C}$ ) with no other recognised cause,
- (b) leucopaenia (white cell count  $<4 \times 10^9/l$ ) or leucocytosis (white cell count  $>12 \times 10^9/l$ ),
- (c) for adults  $>70$  years old, altered mental status with no other recognised cause;

**AND** at least **two** of the following:

- (a) new onset of purulent sputum or change in character of sputum, or increased respiratory secretions, or increased suctioning requirements,
- (b) new onset or worsening cough, or dyspnoea, or tachypnoea,
- (c) rales or bronchial breath sounds,
- (d) worsening gas exchange (hypoxaemia, increased oxygen requirement, increased ventilator demand).

# Reporting checklist for protocol of a clinical trial.

Based on the SPIRIT guidelines.

## Instructions to authors

Complete this checklist by entering the page numbers from your manuscript where readers will find each of the items listed below.

Your article may not currently address all the items on the checklist. Please modify your text to include the missing information. If you are certain that an item does not apply, please write "n/a" and provide a short explanation.

Upload your completed checklist as an extra file when you submit to a journal.

In your methods section, say that you used the SPIRIT reporting guidelines, and cite them as:

Chan A-W, Tetzlaff JM, Altman DG, Laupacis A, Gøtzsche PC, Krleža-Jerić K, Hróbjartsson A, Mann H, Dickersin K, Berlin J, Doré C, Parulekar W, Summerskill W, Groves T, Schulz K, Sox H, Rockhold FW, Rennie D, Moher D. SPIRIT 2013 Statement: Defining standard protocol items for clinical trials. *Ann Intern Med.* 2013;158(3):200-207

|                                             |                     | Reporting Item                                                                                               | Page Number |
|---------------------------------------------|---------------------|--------------------------------------------------------------------------------------------------------------|-------------|
| <b>Administrative information</b>           |                     |                                                                                                              |             |
| Title                                       | <a href="#">#1</a>  | Descriptive title identifying the study design, population, interventions, and, if applicable, trial acronym | 1           |
| Trial registration                          | <a href="#">#2a</a> | Trial identifier and registry name. If not yet registered, name of intended registry                         | 1           |
| Trial registration: data set                | <a href="#">#2b</a> | All items from the World Health Organization Trial Registration Data Set                                     | 1           |
| Protocol version                            | <a href="#">#3</a>  | Date and version identifier                                                                                  | 16          |
| Funding                                     | <a href="#">#4</a>  | Sources and types of financial, material, and other support                                                  | 16          |
| Roles and responsibilities: contributorship | <a href="#">#5a</a> | Names, affiliations, and roles of protocol contributors                                                      | 16          |

|    |                           |                     |                                                              |    |
|----|---------------------------|---------------------|--------------------------------------------------------------|----|
| 1  | Roles and                 | <a href="#">#5b</a> | Name and contact information for the trial sponsor           | 1  |
| 2  | responsibilities:         |                     |                                                              |    |
| 3  | sponsor contact           |                     |                                                              |    |
| 4  | information               |                     |                                                              |    |
| 5  |                           |                     |                                                              |    |
| 6  |                           |                     |                                                              |    |
| 7  |                           |                     |                                                              |    |
| 8  | Roles and                 | <a href="#">#5c</a> | Role of study sponsor and funders, if any, in study design;  | 16 |
| 9  | responsibilities:         |                     | collection, management, analysis, and interpretation of      |    |
| 10 | sponsor and funder        |                     | data; writing of the report; and the decision to submit the  |    |
| 11 |                           |                     | report for publication, including whether they will have     |    |
| 12 |                           |                     | ultimate authority over any of these activities              |    |
| 13 |                           |                     |                                                              |    |
| 14 |                           |                     |                                                              |    |
| 15 |                           |                     |                                                              |    |
| 16 | Roles and                 | <a href="#">#5d</a> | Composition, roles, and responsibilities of the coordinating | 16 |
| 17 | responsibilities:         |                     | centre, steering committee, endpoint adjudication            |    |
| 18 | committees                |                     | committee, data management team, and other individuals       |    |
| 19 |                           |                     | or groups overseeing the trial, if applicable (see Item 21a  |    |
| 20 |                           |                     | for data monitoring committee)                               |    |
| 21 |                           |                     |                                                              |    |
| 22 |                           |                     |                                                              |    |
| 23 |                           |                     |                                                              |    |
| 24 | <b>Introduction</b>       |                     |                                                              |    |
| 25 |                           |                     |                                                              |    |
| 26 |                           |                     |                                                              |    |
| 27 | Background and            | <a href="#">#6a</a> | Description of research question and justification for       | 4  |
| 28 | rationale                 |                     | undertaking the trial, including summary of relevant         |    |
| 29 |                           |                     | studies (published and unpublished) examining benefits       |    |
| 30 |                           |                     | and harms for each intervention                              |    |
| 31 |                           |                     |                                                              |    |
| 32 |                           |                     |                                                              |    |
| 33 |                           |                     |                                                              |    |
| 34 | Background and            | <a href="#">#6b</a> | Explanation for choice of comparators                        | 5  |
| 35 | rationale: choice of      |                     |                                                              |    |
| 36 | comparators               |                     |                                                              |    |
| 37 |                           |                     |                                                              |    |
| 38 |                           |                     |                                                              |    |
| 39 | Objectives                | <a href="#">#7</a>  | Specific objectives or hypotheses                            | 6  |
| 40 |                           |                     |                                                              |    |
| 41 | Trial design              | <a href="#">#8</a>  | Description of trial design including type of trial (eg,     | 7  |
| 42 |                           |                     | parallel group, crossover, factorial, single group),         |    |
| 43 |                           |                     | allocation ratio, and framework (eg, superiority,            |    |
| 44 |                           |                     | equivalence, non-inferiority, exploratory)                   |    |
| 45 |                           |                     |                                                              |    |
| 46 |                           |                     |                                                              |    |
| 47 |                           |                     |                                                              |    |
| 48 | <b>Methods:</b>           |                     |                                                              |    |
| 49 | <b>Participants,</b>      |                     |                                                              |    |
| 50 | <b>interventions, and</b> |                     |                                                              |    |
| 51 | <b>outcomes</b>           |                     |                                                              |    |
| 52 |                           |                     |                                                              |    |
| 53 |                           |                     |                                                              |    |
| 54 |                           |                     |                                                              |    |
| 55 | Study setting             | <a href="#">#9</a>  | Description of study settings (eg, community clinic,         | 7  |
| 56 |                           |                     | academic hospital) and list of countries where data will be  |    |
| 57 |                           |                     | collected. Reference to where list of study sites can be     |    |
| 58 |                           |                     |                                                              |    |
| 59 |                           |                     |                                                              |    |
| 60 |                           |                     |                                                              |    |

obtained

|    |                                 |                      |                                                                                                                                                                                                                                                                                                                                                                                |
|----|---------------------------------|----------------------|--------------------------------------------------------------------------------------------------------------------------------------------------------------------------------------------------------------------------------------------------------------------------------------------------------------------------------------------------------------------------------|
| 1  |                                 |                      |                                                                                                                                                                                                                                                                                                                                                                                |
| 2  |                                 |                      |                                                                                                                                                                                                                                                                                                                                                                                |
| 3  | Eligibility criteria            | <a href="#">#10</a>  | Inclusion and exclusion criteria for participants. If applicable, eligibility criteria for study centres and individuals who will perform the interventions (eg, surgeons, psychotherapists)                                                                                                                                                                                   |
| 4  |                                 |                      |                                                                                                                                                                                                                                                                                                                                                                                |
| 5  |                                 |                      |                                                                                                                                                                                                                                                                                                                                                                                |
| 6  |                                 |                      |                                                                                                                                                                                                                                                                                                                                                                                |
| 7  |                                 |                      |                                                                                                                                                                                                                                                                                                                                                                                |
| 8  |                                 |                      |                                                                                                                                                                                                                                                                                                                                                                                |
| 9  | Interventions: description      | <a href="#">#11a</a> | Interventions for each group with sufficient detail to allow replication, including how and when they will be administered                                                                                                                                                                                                                                                     |
| 10 |                                 |                      |                                                                                                                                                                                                                                                                                                                                                                                |
| 11 |                                 |                      |                                                                                                                                                                                                                                                                                                                                                                                |
| 12 |                                 |                      |                                                                                                                                                                                                                                                                                                                                                                                |
| 13 |                                 |                      |                                                                                                                                                                                                                                                                                                                                                                                |
| 14 | Interventions: modifications    | <a href="#">#11b</a> | Criteria for discontinuing or modifying allocated interventions for a given trial participant (eg, drug dose change in response to harms, participant request, or improving / worsening disease)                                                                                                                                                                               |
| 15 |                                 |                      |                                                                                                                                                                                                                                                                                                                                                                                |
| 16 |                                 |                      |                                                                                                                                                                                                                                                                                                                                                                                |
| 17 |                                 |                      |                                                                                                                                                                                                                                                                                                                                                                                |
| 18 |                                 |                      |                                                                                                                                                                                                                                                                                                                                                                                |
| 19 |                                 |                      |                                                                                                                                                                                                                                                                                                                                                                                |
| 20 |                                 |                      |                                                                                                                                                                                                                                                                                                                                                                                |
| 21 | Interventions: adherence        | <a href="#">#11c</a> | Strategies to improve adherence to intervention protocols, and any procedures for monitoring adherence (eg, drug tablet return; laboratory tests)                                                                                                                                                                                                                              |
| 22 |                                 |                      |                                                                                                                                                                                                                                                                                                                                                                                |
| 23 |                                 |                      |                                                                                                                                                                                                                                                                                                                                                                                |
| 24 |                                 |                      |                                                                                                                                                                                                                                                                                                                                                                                |
| 25 |                                 |                      |                                                                                                                                                                                                                                                                                                                                                                                |
| 26 |                                 |                      |                                                                                                                                                                                                                                                                                                                                                                                |
| 27 | Interventions: concomitant care | <a href="#">#11d</a> | Relevant concomitant care and interventions that are permitted or prohibited during the trial                                                                                                                                                                                                                                                                                  |
| 28 |                                 |                      |                                                                                                                                                                                                                                                                                                                                                                                |
| 29 |                                 |                      |                                                                                                                                                                                                                                                                                                                                                                                |
| 30 |                                 |                      |                                                                                                                                                                                                                                                                                                                                                                                |
| 31 | Outcomes                        | <a href="#">#12</a>  | Primary, secondary, and other outcomes, including the specific measurement variable (eg, systolic blood pressure), analysis metric (eg, change from baseline, final value, time to event), method of aggregation (eg, median, proportion), and time point for each outcome. Explanation of the clinical relevance of chosen efficacy and harm outcomes is strongly recommended |
| 32 |                                 |                      |                                                                                                                                                                                                                                                                                                                                                                                |
| 33 |                                 |                      |                                                                                                                                                                                                                                                                                                                                                                                |
| 34 |                                 |                      |                                                                                                                                                                                                                                                                                                                                                                                |
| 35 |                                 |                      |                                                                                                                                                                                                                                                                                                                                                                                |
| 36 |                                 |                      |                                                                                                                                                                                                                                                                                                                                                                                |
| 37 |                                 |                      |                                                                                                                                                                                                                                                                                                                                                                                |
| 38 |                                 |                      |                                                                                                                                                                                                                                                                                                                                                                                |
| 39 |                                 |                      |                                                                                                                                                                                                                                                                                                                                                                                |
| 40 |                                 |                      |                                                                                                                                                                                                                                                                                                                                                                                |
| 41 |                                 |                      |                                                                                                                                                                                                                                                                                                                                                                                |
| 42 | Participant timeline            | <a href="#">#13</a>  | Time schedule of enrolment, interventions (including any run-ins and washouts), assessments, and visits for participants. A schematic diagram is highly recommended (see Figure)                                                                                                                                                                                               |
| 43 |                                 |                      |                                                                                                                                                                                                                                                                                                                                                                                |
| 44 |                                 |                      |                                                                                                                                                                                                                                                                                                                                                                                |
| 45 |                                 |                      |                                                                                                                                                                                                                                                                                                                                                                                |
| 46 |                                 |                      |                                                                                                                                                                                                                                                                                                                                                                                |
| 47 |                                 |                      |                                                                                                                                                                                                                                                                                                                                                                                |
| 48 |                                 |                      |                                                                                                                                                                                                                                                                                                                                                                                |
| 49 | Sample size                     | <a href="#">#14</a>  | Estimated number of participants needed to achieve study objectives and how it was determined, including clinical and statistical assumptions supporting any sample size calculations                                                                                                                                                                                          |
| 50 |                                 |                      |                                                                                                                                                                                                                                                                                                                                                                                |
| 51 |                                 |                      |                                                                                                                                                                                                                                                                                                                                                                                |
| 52 |                                 |                      |                                                                                                                                                                                                                                                                                                                                                                                |
| 53 |                                 |                      |                                                                                                                                                                                                                                                                                                                                                                                |
| 54 |                                 |                      |                                                                                                                                                                                                                                                                                                                                                                                |
| 55 | Recruitment                     | <a href="#">#15</a>  | Strategies for achieving adequate participant enrolment to reach target sample size                                                                                                                                                                                                                                                                                            |
| 56 |                                 |                      |                                                                                                                                                                                                                                                                                                                                                                                |
| 57 |                                 |                      |                                                                                                                                                                                                                                                                                                                                                                                |
| 58 |                                 |                      |                                                                                                                                                                                                                                                                                                                                                                                |
| 59 |                                 |                      |                                                                                                                                                                                                                                                                                                                                                                                |
| 60 |                                 |                      |                                                                                                                                                                                                                                                                                                                                                                                |



1 **Methods:**

2 **Assignment of**  
3 **interventions (for**  
4 **controlled trials)**  
5  
6

|    |                      |                      |                                                                |
|----|----------------------|----------------------|----------------------------------------------------------------|
| 7  |                      |                      |                                                                |
| 8  | Allocation: sequence | <a href="#">#16a</a> | Method of generating the allocation sequence (eg, n/a          |
| 9  | generation           |                      | computer-generated random numbers), and list of any            |
| 10 |                      |                      | factors for stratification. To reduce predictability of a      |
| 11 |                      |                      | random sequence, details of any planned restriction (eg,       |
| 12 |                      |                      | blocking) should be provided in a separate document that       |
| 13 |                      |                      | is unavailable to those who enrol participants or assign       |
| 14 |                      |                      | interventions                                                  |
| 15 |                      |                      |                                                                |
| 16 |                      |                      |                                                                |
| 17 |                      |                      |                                                                |
| 18 |                      |                      |                                                                |
| 19 | Allocation           | <a href="#">#16b</a> | Mechanism of implementing the allocation sequence (eg, n/a     |
| 20 | concealment          |                      | central telephone; sequentially numbered, opaque, sealed       |
| 21 | mechanism            |                      | envelopes), describing any steps to conceal the sequence       |
| 22 |                      |                      | until interventions are assigned                               |
| 23 |                      |                      |                                                                |
| 24 |                      |                      |                                                                |
| 25 |                      |                      |                                                                |
| 26 | Allocation:          | <a href="#">#16c</a> | Who will generate the allocation sequence, who will enrol n/a  |
| 27 | implementation       |                      | participants, and who will assign participants to              |
| 28 |                      |                      | interventions                                                  |
| 29 |                      |                      |                                                                |
| 30 |                      |                      |                                                                |
| 31 | Blinding (masking)   | <a href="#">#17a</a> | Who will be blinded after assignment to interventions (eg, n/a |
| 32 |                      |                      | trial participants, care providers, outcome assessors, data    |
| 33 |                      |                      | analysts), and how                                             |
| 34 |                      |                      |                                                                |
| 35 |                      |                      |                                                                |
| 36 | Blinding (masking):  | <a href="#">#17b</a> | If blinded, circumstances under which unblinding is n/a        |
| 37 | emergency unblinding |                      | permissible, and procedure for revealing a participant's       |
| 38 |                      |                      | allocated intervention during the trial                        |
| 39 |                      |                      |                                                                |
| 40 |                      |                      |                                                                |

41 **Methods: Data**  
42 **collection,**  
43 **management, and**  
44 **analysis**  
45  
46  
47

|    |                      |                      |                                                              |
|----|----------------------|----------------------|--------------------------------------------------------------|
| 48 |                      |                      |                                                              |
| 49 | Data collection plan | <a href="#">#18a</a> | Plans for assessment and collection of outcome, baseline, 12 |
| 50 |                      |                      | and other trial data, including any related processes to     |
| 51 |                      |                      | promote data quality (eg, duplicate measurements,            |
| 52 |                      |                      | training of assessors) and a description of study            |
| 53 |                      |                      | instruments (eg, questionnaires, laboratory tests) along     |
| 54 |                      |                      | with their reliability and validity, if known. Reference to  |
| 55 |                      |                      | where data collection forms can be found, if not in the      |
| 56 |                      |                      |                                                              |
| 57 |                      |                      |                                                              |
| 58 |                      |                      |                                                              |
| 59 |                      |                      |                                                              |

protocol

|    |                            |                      |                                                                |
|----|----------------------------|----------------------|----------------------------------------------------------------|
| 1  |                            |                      |                                                                |
| 2  |                            |                      |                                                                |
| 3  | Data collection plan:      | <a href="#">#18b</a> | Plans to promote participant retention and complete            |
| 4  | retention                  |                      | follow-up, including list of any outcome data to be            |
| 5  |                            |                      | collected for participants who discontinue or deviate from     |
| 6  |                            |                      | intervention protocols                                         |
| 7  |                            |                      |                                                                |
| 8  |                            |                      |                                                                |
| 9  | Data management            | <a href="#">#19</a>  | Plans for data entry, coding, security, and storage,           |
| 10 |                            |                      | including any related processes to promote data quality        |
| 11 |                            |                      | (eg, double data entry; range checks for data values).         |
| 12 |                            |                      | Reference to where details of data management                  |
| 13 |                            |                      | procedures can be found, if not in the protocol                |
| 14 |                            |                      |                                                                |
| 15 |                            |                      |                                                                |
| 16 |                            |                      |                                                                |
| 17 | Statistics: outcomes       | <a href="#">#20a</a> | Statistical methods for analysing primary and secondary        |
| 18 |                            |                      | outcomes. Reference to where other details of the              |
| 19 |                            |                      | statistical analysis plan can be found, if not in the protocol |
| 20 |                            |                      |                                                                |
| 21 |                            |                      |                                                                |
| 22 |                            |                      |                                                                |
| 23 | Statistics: additional     | <a href="#">#20b</a> | Methods for any additional analyses (eg, subgroup and          |
| 24 | analyses                   |                      | adjusted analyses)                                             |
| 25 |                            |                      |                                                                |
| 26 |                            |                      |                                                                |
| 27 | Statistics: analysis       | <a href="#">#20c</a> | Definition of analysis population relating to protocol non-    |
| 28 | population and             |                      | adherence (eg, as randomised analysis), and any                |
| 29 | missing data               |                      | statistical methods to handle missing data (eg, multiple       |
| 30 |                            |                      | imputation)                                                    |
| 31 |                            |                      |                                                                |
| 32 |                            |                      |                                                                |
| 33 | <b>Methods: Monitoring</b> |                      |                                                                |
| 34 |                            |                      |                                                                |
| 35 |                            |                      |                                                                |
| 36 | Data monitoring:           | <a href="#">#21a</a> | Composition of data monitoring committee (DMC);                |
| 37 | formal committee           |                      | summary of its role and reporting structure; statement of      |
| 38 |                            |                      | whether it is independent from the sponsor and competing       |
| 39 |                            |                      | interests; and reference to where further details about its    |
| 40 |                            |                      | charter can be found, if not in the protocol. Alternatively,   |
| 41 |                            |                      | an explanation of why a DMC is not needed                      |
| 42 |                            |                      |                                                                |
| 43 |                            |                      |                                                                |
| 44 |                            |                      |                                                                |
| 45 |                            |                      |                                                                |
| 46 | Data monitoring:           | <a href="#">#21b</a> | Description of any interim analyses and stopping               |
| 47 | interim analysis           |                      | guidelines, including who will have access to these interim    |
| 48 |                            |                      | results and make the final decision to terminate the trial     |
| 49 |                            |                      |                                                                |
| 50 |                            |                      |                                                                |
| 51 | Harms                      | <a href="#">#22</a>  | Plans for collecting, assessing, reporting, and managing       |
| 52 |                            |                      | solicited and spontaneously reported adverse events and        |
| 53 |                            |                      | other unintended effects of trial interventions or trial       |
| 54 |                            |                      | conduct                                                        |
| 55 |                            |                      |                                                                |
| 56 |                            |                      |                                                                |
| 57 |                            |                      |                                                                |
| 58 | Auditing                   | <a href="#">#23</a>  | Frequency and procedures for auditing trial conduct, if        |
| 59 |                            |                      |                                                                |
| 60 |                            |                      |                                                                |

any, and whether the process will be independent from investigators and the sponsor

## Ethics and dissemination

|                                      |                      |                                                                                                                                                                                                                                                                                     |    |
|--------------------------------------|----------------------|-------------------------------------------------------------------------------------------------------------------------------------------------------------------------------------------------------------------------------------------------------------------------------------|----|
| Research ethics approval             | <a href="#">#24</a>  | Plans for seeking research ethics committee / institutional review board (REC / IRB) approval                                                                                                                                                                                       | 16 |
| Protocol amendments                  | <a href="#">#25</a>  | Plans for communicating important protocol modifications (eg, changes to eligibility criteria, outcomes, analyses) to relevant parties (eg, investigators, REC / IRBs, trial participants, trial registries, journals, regulators)                                                  | 16 |
| Consent or assent                    | <a href="#">#26a</a> | Who will obtain informed consent or assent from potential trial participants or authorised surrogates, and how (see Item 32)                                                                                                                                                        | 15 |
| Consent or assent: ancillary studies | <a href="#">#26b</a> | Additional consent provisions for collection and use of participant data and biological specimens in ancillary studies, if applicable                                                                                                                                               | 15 |
| Confidentiality                      | <a href="#">#27</a>  | How personal information about potential and enrolled participants will be collected, shared, and maintained in order to protect confidentiality before, during, and after the trial                                                                                                | 15 |
| Declaration of interests             | <a href="#">#28</a>  | Financial and other competing interests for principal investigators for the overall trial and each study site                                                                                                                                                                       | 16 |
| Data access                          | <a href="#">#29</a>  | Statement of who will have access to the final trial dataset, and disclosure of contractual agreements that limit such access for investigators                                                                                                                                     | 15 |
| Ancillary and post trial care        | <a href="#">#30</a>  | Provisions, if any, for ancillary and post-trial care, and for compensation to those who suffer harm from trial participation                                                                                                                                                       | 16 |
| Dissemination policy: trial results  | <a href="#">#31a</a> | Plans for investigators and sponsor to communicate trial results to participants, healthcare professionals, the public, and other relevant groups (eg, via publication, reporting in results databases, or other data sharing arrangements), including any publication restrictions | 16 |
| Dissemination policy:                | <a href="#">#31b</a> | Authorship eligibility guidelines and any intended use of                                                                                                                                                                                                                           | 16 |

|   |                       |                      |                                                                 |
|---|-----------------------|----------------------|-----------------------------------------------------------------|
| 1 | authorship            | professional writers |                                                                 |
| 2 | Dissemination policy: | <a href="#">#31c</a> | Plans, if any, for granting public access to the full protocol, |
| 3 | reproducible research |                      | participant-level dataset, and statistical code                 |
| 4 |                       |                      | 16                                                              |
| 5 |                       |                      |                                                                 |

## 6 Appendices

|    |                      |                     |                                                               |
|----|----------------------|---------------------|---------------------------------------------------------------|
| 7  |                      |                     |                                                               |
| 8  | Informed consent     | <a href="#">#32</a> | Model consent form and other related documentation            |
| 9  | materials            |                     | given to participants and authorised surrogates               |
| 10 |                      |                     | n/a                                                           |
| 11 |                      |                     |                                                               |
| 12 | Biological specimens | <a href="#">#33</a> | Plans for collection, laboratory evaluation, and storage of   |
| 13 |                      |                     | biological specimens for genetic or molecular analysis in     |
| 14 |                      |                     | the current trial and for future use in ancillary studies, if |
| 15 |                      |                     | applicable                                                    |
| 16 |                      |                     | n/a                                                           |
| 17 |                      |                     |                                                               |
| 18 |                      |                     |                                                               |

19 The SPIRIT checklist is distributed under the terms of the Creative Commons Attribution License CC-  
 20 BY-ND 3.0. This checklist was completed on 17. December 2019 using <https://www.goodreports.org/>,  
 21 a tool made by the [EQUATOR Network](#) in collaboration with [Penelope.ai](#)  
 22  
 23  
 24  
 25  
 26  
 27  
 28  
 29  
 30  
 31  
 32  
 33  
 34  
 35  
 36  
 37  
 38  
 39  
 40  
 41  
 42  
 43  
 44  
 45  
 46  
 47  
 48  
 49  
 50  
 51  
 52  
 53  
 54  
 55  
 56  
 57  
 58  
 59  
 60

# BMJ Open

## Protocol for a feasibility study of smoking cessation in the surgical pathway before major lung surgery: Project MURRAY

|                                  |                                                                                                                                                                                                                                                                                                                                                                                                                                                                                                                                                                                                                                                                                                                                                                                                    |
|----------------------------------|----------------------------------------------------------------------------------------------------------------------------------------------------------------------------------------------------------------------------------------------------------------------------------------------------------------------------------------------------------------------------------------------------------------------------------------------------------------------------------------------------------------------------------------------------------------------------------------------------------------------------------------------------------------------------------------------------------------------------------------------------------------------------------------------------|
| Journal:                         | <i>BMJ Open</i>                                                                                                                                                                                                                                                                                                                                                                                                                                                                                                                                                                                                                                                                                                                                                                                    |
| Manuscript ID                    | bmjopen-2019-036568.R1                                                                                                                                                                                                                                                                                                                                                                                                                                                                                                                                                                                                                                                                                                                                                                             |
| Article Type:                    | Protocol                                                                                                                                                                                                                                                                                                                                                                                                                                                                                                                                                                                                                                                                                                                                                                                           |
| Date Submitted by the Author:    | 29-Jun-2020                                                                                                                                                                                                                                                                                                                                                                                                                                                                                                                                                                                                                                                                                                                                                                                        |
| Complete List of Authors:        | Lugg, Sebastian; University of Birmingham, Institute of Inflammation and Ageing<br>Kerr, Amy; University Hospitals Birmingham NHS Foundation Trust<br>Kadiri, Salma; University Hospitals Birmingham NHS Foundation Trust<br>Budacan, Alina; University Hospitals Birmingham NHS Foundation Trust<br>Farley, Amanda; University of Birmingham, Institute of Applied Health Research<br>Perski, Olga; University College London, Institute of Epidemiology & Health<br>West, Robert; University College London, Institute of Epidemiology & Health<br>Brown, Jamie; University College London, Institute of Epidemiology & Health<br>Thickett, David; University of Birmingham, Institute of Inflammation and Ageing<br>Naidu, Babu; University of Birmingham, Institute of Inflammation and Ageing |
| <b>Primary Subject Heading</b> : | Smoking and tobacco                                                                                                                                                                                                                                                                                                                                                                                                                                                                                                                                                                                                                                                                                                                                                                                |
| Secondary Subject Heading:       | Surgery, Respiratory medicine, Anaesthesia, Addiction                                                                                                                                                                                                                                                                                                                                                                                                                                                                                                                                                                                                                                                                                                                                              |
| Keywords:                        | Cardiothoracic surgery < SURGERY, Adult thoracic medicine < THORACIC MEDICINE, Adult anaesthesia < ANAESTHETICS                                                                                                                                                                                                                                                                                                                                                                                                                                                                                                                                                                                                                                                                                    |
|                                  |                                                                                                                                                                                                                                                                                                                                                                                                                                                                                                                                                                                                                                                                                                                                                                                                    |

SCHOLARONE™  
Manuscripts



I, the Submitting Author has the right to grant and does grant on behalf of all authors of the Work (as defined in the below author licence), an exclusive licence and/or a non-exclusive licence for contributions from authors who are: i) UK Crown employees; ii) where BMJ has agreed a CC-BY licence shall apply, and/or iii) in accordance with the terms applicable for US Federal Government officers or employees acting as part of their official duties; on a worldwide, perpetual, irrevocable, royalty-free basis to BMJ Publishing Group Ltd ("BMJ") its licensees and where the relevant Journal is co-owned by BMJ to the co-owners of the Journal, to publish the Work in this journal and any other BMJ products and to exploit all rights, as set out in our [licence](#).

The Submitting Author accepts and understands that any supply made under these terms is made by BMJ to the Submitting Author unless you are acting as an employee on behalf of your employer or a postgraduate student of an affiliated institution which is paying any applicable article publishing charge ("APC") for Open Access articles. Where the Submitting Author wishes to make the Work available on an Open Access basis (and intends to pay the relevant APC), the terms of reuse of such Open Access shall be governed by a Creative Commons licence – details of these licences and which [Creative Commons](#) licence will apply to this Work are set out in our licence referred to above.

Other than as permitted in any relevant BMJ Author's Self Archiving Policies, I confirm this Work has not been accepted for publication elsewhere, is not being considered for publication elsewhere and does not duplicate material already published. I confirm all authors consent to publication of this Work and authorise the granting of this licence.

**TITLE****Protocol for a feasibility study of smoking cessation in the surgical pathway before major lung surgery: Project MURRAY**

Corresponding author:

Mr Babu Naidu

Institute of Inflammation and Ageing, College of Medical and Dental Sciences,

University of Birmingham, B15 2TT

b.naidu@bham.ac.uk

Tel: +44 (0)121 371 3228

**Sebastian T Lugg,<sup>1,2</sup> Amy Kerr,<sup>1</sup> Salma Kadiri,<sup>1</sup> Alina Budacan,<sup>1</sup> Amanda Farley,<sup>3</sup> Olga Perski,<sup>4</sup> Robert West,<sup>4</sup> Jamie Brown,<sup>4</sup> David Thickett,<sup>1</sup> Babu Naidu,<sup>1</sup> on behalf of the Project MURRAY Investigators**

1. Institute of Inflammation and Ageing, College of Medical and Dental Sciences, University of Birmingham, Birmingham, UK.
2. Department of Thoracic Surgery, Heartlands Hospital, University Hospitals Birmingham NHS Foundation Trust, Birmingham, UK.
3. Institute of Applied Health Research, University of Birmingham, UK.
4. Institute of Epidemiology and Health, University College London, UK.

**Keywords**

Thoracic surgery, smoking cessation intervention, perioperative medicine, postoperative pulmonary complication, clinical trial

**ABSTRACT**

**Introduction:** Smoking prior to major thoracic surgery is the biggest risk factor for development of postoperative pulmonary complications, with 1 in 5 patients continuing to smoke before surgery. Current guidance is that all patients should stop smoking before elective surgery yet very few are offered specialist smoking cessation support. Patients would prefer support within the thoracic surgical pathway. No study has addressed the effectiveness of such an intervention in this setting on cessation. The overall aim is to determine in patients who undergo major elective thoracic surgery whether an intervention integrated (INT) into the surgical pathway improves smoking cessation rates compared with usual care (UC) of standard community/hospital based NHS smoking support. This pilot study will evaluate feasibility of a substantive trial.

**Methods and analysis:** Project MURRAY is a trial comparing the effectiveness of INT and UC on smoking cessation. INT is pharmacotherapy and a hybrid of behavioural support delivered by the trained healthcare practitioners (HCPs) in the thoracic surgical pathway and a complimentary web-based application. This pilot study will evaluate the feasibility of a substantive trial and study processes in 5 adult thoracic centres including the University Hospitals Birmingham NHS Foundation Trust. The primary objective is to establish the proportion of those eligible who agree to participate. Secondary objectives include evaluation of study processes. Analyses of feasibility and patient-reported outcomes will take the form of simple descriptive statistics and where appropriate, point estimates of effects sizes and associated 95% CIs.

**Ethics and dissemination:** The study has obtained ethical approval from NHS Research Ethics Committee (REC number 19/WM/0097). Dissemination plan includes: informing patients and HCPs; engaging multidisciplinary professionals to support a proposal of a definitive trial and submission for a full application dependent on the success of the study.

**Trial Registration Number:** NCT04190966; Pre-results



### Strengths and limitations of the study

- This study addresses smoking in major thoracic surgery which can result in a significant economic and healthcare burden.
- This study will assess the role of a hybrid model of integrated smoking cessation within the surgical pathway delivered by trained healthcare practitioners and use of a web-based application.
- This feasibility study will assess patient recruitment to inform a definitive study.
- This study will add to the limited evidence towards of effective smoking cessation strategies in major thoracic surgery.
- This feasibility study will not answer the overarching research question of efficacy but will directly inform a well-designed definitive study.

## INTRODUCTION

### Poorer outcomes for smokers in thoracic surgery

25,000 patients undergo major thoracic surgery every year in the UK (1). 1 in 5 patients smoke before surgery, which increases the risk of developing postoperative pulmonary complications including pneumonia and lung collapse. Just under half of smokers develop these complications with associated increased in-hospital mortality (0.5% to 12%), intensive therapy unit admissions (1.5% to 26%), increased hospital stay (5 to 14 days) and poorer long-term outcomes (2-4). Furthermore, lung cancer surgery patients have an 86% increased risk for cancer recurrence and two-fold decrease in 5-year survival compared with patients who quit smoking at diagnosis (5).

### The need for integrated hospital-based smoking cessation support

The current NICE guidance is that smokers undergoing 'elective' surgery should receive behavioural support and stop-smoking pharmacotherapy as early as possible in their outpatient or pre-operative assessments. This should be offered weekly, preferably face-to-face, for a minimum of 4 weeks after the quit date (6). The Cochrane review supporting this type of 'intensive' intervention (7) was based on two small trials in orthopaedics and general surgery (8, 9).

However in current practice most thoracic surgery patients do not receive any pre-operative smoking cessation support. Of the 120 patients attending a large UK thoracic regional unit only 40% of current smokers were offered support (10), similar to the proportion of all eligible pre-operative patients agreeing to participate in smoking cessation studies (11, 12). Only 1 in 3 smokers self-report abstinence at the time of lung cancer surgery (4), with biochemical verification indicating much lower quit rates (7).

Thus the current usual care (UC) of referral to stop-smoking services does not meet the standard set by NICE. This may be due to these services being designed to promote long-term quitting, which many smokers undergoing surgery may not be willing to commit to. Many patients also report that attending smoking cessation clinic appointments during their work-up for surgery is a significant barrier to stopping smoking and would prefer bespoke support during hospital visits (13).

1  
2  
3  
4  
5 In pre-operative smoking cessation studies, behavioural support is delivered either by  
6 research nurses or independent smoking cessation practitioners (12, 14). It is logical that  
7 HCPs in the surgical pathway could be trained to deliver the support due to the high  
8 prevalence of smoking within this patient group. This approach is advocated by both the  
9 Lung Cancer Nurse Forum and the Society of Cardiothoracic Surgery (UK) and evidence  
10 suggests that nurse delivered smoking cessation interventions are effective (15). Timely  
11 access is also crucial; NICE lung cancer guidelines recommend that surgery should not be  
12 delayed to give up smoking (16) and needs to be performed within 62 days of presentation  
13 and 31 days of diagnosis to avoid heavy financial penalties on individual Trusts (17).  
14 Therefore avoiding delays in receiving behavioural and pharmacological support is of  
15 paramount importance.  
16  
17  
18  
19  
20  
21  
22

### 23 **Poor quality of available smoking cessation applications**

24  
25  
26  
27 A combination of a web-based application (web app) with structured face-to-face behavioural  
28 support may aid successful quit attempts, whilst also supporting HCPs in delivering smoking  
29 cessation support throughout the surgical pathway. A recent review of over 100 smoking  
30 cessation apps showed that only 6 were deemed to be of high quality (18). There are no  
31 apps specifically designed for smoking cessation in patients undergoing major surgery and  
32 none designed to provide hybrid support alongside a trained smoking cessation practitioner.  
33  
34  
35  
36  
37

### 38 **Summary**

39  
40  
41  
42 Many patients who undergo thoracic surgery continue to smoke, and effective pre-operative  
43 smoking cessation interventions may improve outcomes. However, there are few studies  
44 exploring strategies for integrating smoking cessation into the patient pathway, which is a  
45 high priority area for research in these patients. We have developed a bespoke, tailored  
46 intense, integrated smoking cessation intervention to test in a 'real-life' clinical trial within the  
47 UK. The intervention involves pharmacotherapy and a hybrid of support delivered by trained  
48 HCPs in the thoracic surgical pathway and a complementary web app. Support may be  
49 particularly effective because of site of the surgery, the lungs, makes this a clear 'teachable  
50 moment' for patients (19, 20).  
51  
52  
53  
54  
55  
56  
57

### 58 **Study aim**

1  
2  
3 The overall aim of this research is to determine if integrated (INT) smoking cessation support  
4 in the surgical pathway improves smoking cessation rates in patients undergoing major  
5 elective thoracic surgery when compared with usual care (UC) of standard  
6 community/hospital based NHS smoking cessation support. To answer this research  
7 question with substantial evidence of the clinical and cost-effectiveness of INT approach, a  
8 multi-centre RCT is required. Feasibility studies are a recommended pre-requisite to assess  
9 feasibility of a large and expensive full-scale trial. We have therefore designed this  
10 multicentre feasibility study, which aims evaluate the feasibility of the INT by making the  
11 following quantitative and qualitative assessments.  
12  
13  
14  
15  
16  
17  
18

### 19 **Objectives of the feasibility study**

20  
21  
22 The aims of the feasibility study are to assess various aspects of the trial design and  
23 management and not to determine the relative effectiveness of INT versus UC.  
24  
25  
26

### 27 **Primary Objective**

28  
29  
30 To establish the number of patients who agree to participate in the intervention as a  
31 proportion of those eligible to enter the study.  
32  
33  
34  
35

### 36 **Secondary Objectives**

- 37  
38  
39  
40  
41  
42  
43  
44  
45  
46  
47  
48  
49  
50  
51  
52  
53  
54  
55  
56  
57  
58  
59  
60
1. Integration of the intervention into the clinical pathway by time from decision to operate from study recruitment.
  2. Explore barriers to study recruitment, including descriptive reasons for non-participation from screening logs.
  3. Fine-tune study procedures and pilot data capture forms aiming for over 90% completion of important perioperative data for each patient.
  4. To assess the proportion of patients in the INT group who have quit smoking by the day of surgery and one month after surgery.
  5. To assess the proportion of patients in the observation only UC group who have quit smoking by the day of surgery and one month after surgery.
  6. To define the variability of smoking cessation practices in all patients using the nicotine replacement usage questionnaire.

- 1  
2  
3 7. Qualitative interview: To understand patients' experiences of and engagement with the  
4 intervention, and any unintended consequences; To establish whether the intervention is  
5 acceptable to thoracic surgery patients and staff and investigate recommendations for  
6 optimisation of intervention delivery.  
7  
8  
9

## 10 TRIAL DESIGN

### 11 Design

12  
13  
14  
15  
16  
17  
18 Project Murray is an RCT comparing the effectiveness of INT verses UC in smoking  
19 cessation rates in patients undergoing major thoracic surgery, taking form of a stepped  
20 wedge cluster randomised controlled trial (21), and as such will not require individual patient  
21 randomisation. This feasibility study will evaluate the substantive trial and study processes.  
22  
23  
24

### 25 Setting

26  
27  
28  
29  
30  
31  
32  
33  
34  
35  
36  
37  
38  
39  
40  
41  
42  
43  
44  
45  
46  
47  
48  
49  
50  
51  
52  
53  
54  
55  
56  
57  
58  
59  
60  
Trial recruitment will be over a period of 12 months with an additional 6-month follow-up  
period. Recruitment will initiate at the University Hospitals Birmingham NHS Foundation  
Trust, which is the trial co-ordinating site and performs >1000 major thoracic surgical  
procedures a year. Additional recruitment will involve 4 further regional thoracic surgical  
centres performing >400 major thoracic surgical procedures a year.

### Flow of participants during the trial

61  
62  
63  
64  
65  
66  
67  
68  
69  
70  
71  
72  
73  
74  
75  
76  
77  
78  
79  
80  
81  
82  
83  
84  
85  
86  
87  
88  
89  
90  
91  
92  
93  
94  
95  
96  
97  
98  
99  
100  
The anticipated pathway of patients through the trial is shown in the trial schema (Figure 1).  
All adult patients who fulfil the inclusion and exclusion criteria during the study period will be  
approached and participant information sheets (PIS) will be provided. Written informed  
consent will be obtained after an opportunity for patients to discuss requirements for the  
study. If the patient accepts the intervention, they will be placed into the INT group of the  
study. If they decline the intervention they will be invited to take part in the observational only  
part of the study and will receive usual care (UC). We will extract routinely collected pre- and  
post-operative data from patient's medical records and also collect data using  
questionnaires. Adverse events will be collected throughout the duration of the study. The  
summary of assessments is detailed in (Table 1).

## Study Eligibility

### Inclusion Criteria

- Current tobacco smoker (smoked within the last 28 days)
- Major Thoracic Surgery (including both open and minimally invasive approach)
- Able to provide written informed consent
- At least 1 weeks' time to surgery
- Age over 18 years

### Exclusion criteria

- Emergency thoracic surgery
- Inability to perform exhaled carbon monoxide (CO) measurements

### Patient Identification and screening procedure

Patients who are listed for major thoracic surgery will be identified and screened for eligibility prior to surgery. If a patient is screened and not eligible for the study or does not consent to be in the intervention or observation group, a record of the case will be kept in the screening log and will inform recruitment targets. No further information will be collected on ineligible patients or those that have not given consent for participation in the study.

### Patient Recruitment

The PIS, developed with feedback from our Patient and Public Involvement (PPI) representatives, will be sent to the patient before the initial consultation, allowing time for the patient to review and ask questions. As part of the normal consultation process, the HCP will deliver a brief intervention detailing the importance of smoking cessation as per standard clinical practise (National Centre for Smoking Cessation Training [NCSCT] - Ask, Advice, Act). Patients will then be asked to consider and consent to a trial testing the new bespoke integrated smoking cessation support delivered in secondary care by the surgical/nursing team. If a patient does not wish to enter the INT arm they will be approached to take part in the UC arm of the study.

If patients want to join the trial on the day of the clinic appointment, they can do so, as the intervention is low risk and aimed at being offered 'there and then'. A research team member

1  
2  
3 will obtain written informed consent with delegated authority from the Principal Investigator.  
4 A copy of the signed consent form will be given to the participants and a copy will be placed  
5 in the medical notes. The original consent form will be stored in the investigators site file.  
6  
7  
8 Consent will be sought at every study contact and participants will be made aware that they  
9 are free to withdraw consent at any time without reprisal. Participants will be consented to  
10 inform their GP of their involvement in the study.  
11  
12

### 13 14 **Intervention development**

15  
16  
17 A smoking cessation package has been developed using best practice from NICE/NCSCT  
18 involving pharmacotherapy and a hybrid of behavioural support delivered by trained HCPs in  
19 the thoracic surgical pathway and a complementary web app. 'Quit4Surgery' is a web app  
20 created using a user centred design approach and developed through a series of design  
21 workshops with patients, HCPs, academic researchers with expertise in smoking cessation  
22 and informed by behavioural frameworks/motivation theory. The iterative development was  
23 handled with 'Agile' and SCRUM project management (22, 23). 'Quit4Surgery' contains  
24 behaviour change techniques that research suggests can improve the chances of quitting,  
25 including goal setting, self-monitoring, feedback, rewards, information about health  
26 consequences, advice on medication use, advice on changing routines, advice on coping  
27 and support for identity change (24). 'Quit4Surgery' also enables HCPs to record and enter  
28 patients' CO levels.  
29  
30  
31  
32  
33  
34  
35  
36  
37

### 38 **Integration of full package of support into the surgical pathway (INT)**

39  
40  
41 1) INT will be delivered by key HCPs in the surgical pathway (i.e. surgical nurses, lung  
42 cancer nurses, or pre-operative assessment nurses) who have received the NCSCT training  
43 to deliver behavioural support required for stop smoking practitioners with specific focus on  
44 major surgical patients (25). The initial consultation of 15-30 minutes will occur either on the  
45 day of consent or at the earliest convenience for the patient. This will be in a private room  
46 and will outline the benefits of stopping smoking before thoracic surgery, discuss  
47 pharmacotherapy options, provide behavioural support (26-29), decide on an early quit date  
48 (aim within 48 hours of consent) and provide further information regarding 'Quit4Surgery'.  
49 The HCP will validate and quantify smoking amount using CO measurements, which will be  
50 repeated at subsequent face-to-face interactions, providing biofeedback upon the success of  
51 smoking cessation to the patient.  
52  
53  
54  
55  
56  
57  
58  
59  
60



1  
2  
3 2) Pharmacotherapy is encouraged for all patients and includes either combined short- and  
4 long-acting nicotine replacement therapy (NRT) or varenicline, which are provided as  
5 standard care within the NHS. Patients wishing to use e-cigarettes will be given advice as  
6 per the NCSCT guidance (30). Treatment will be maintained for the peri-operative period to  
7 offset nicotine withdrawal symptoms and is typically 8-12 weeks for NRT and 12 weeks for  
8 varenicline as per NCSCT guidance, with pharmacotherapy and behavioural support tailored  
9 appropriately to individual patients.  
10  
11  
12  
13  
14

15  
16 3) 'Quit4Surgery' will collect feedback regarding the patient's engagement, cravings and  
17 abstinence and provide motivational feedback to support the patient. The motivational  
18 feedback provided by the web app is guided by established behavioural change theory and  
19 will complement the patients smoking cessation package. Patient feedback using the web  
20 app to the surgical team will guide them as to the need for additional contact if the patient  
21 wishes. This will help improve overall efficacy of the intervention.  
22  
23  
24  
25  
26

27 INT patients will receive proactive support within 2 days of the quit date (in person or by  
28 telephone) and then weekly until one month after surgery. The weekly sessions will  
29 concentrate on facilitators and barriers to quitting, relapse, pharmacotherapy side effects  
30 and withdrawal symptoms. Face-to-face interactions will occur during the surgical outpatient  
31 appointments, pre-clerking clinic and during hospital admission to reduce the number of  
32 additional visits. If patients are unable to attend face-to-face visits, videoconferencing or  
33 telephone visits will be attempted. Thus the INT will fit into the 'referral to treatment' target  
34 time frame and ensuring surgery is not delayed as recommended by NICE.  
35  
36  
37  
38  
39  
40

### 41 **Control group of usual care (UC)**

42  
43  
44

45 As part of the feasibility study, for those patients who decline consent to receive the  
46 intervention, we ask if they would consent to be observed during the thoracic surgical  
47 pathway. Termed usual care (UC), per usual local practice, patients are typically given a  
48 leaflet about the benefits of smoking cessation and referred to their local NHS smoking  
49 cessation service, which typically last up to 12 weeks and include pharmacotherapy.  
50 Patients will also be invited for an optional telephone interview after discharge. This is to  
51 help understand smoking cessation rates in usual care as well as the reasoning for non-  
52 participation in the intervention. Both groups will receive the same pre-, peri- and post-  
53 operative care as per protocol.  
54  
55  
56  
57  
58  
59  
60



## Withdrawal from the Trial

Withdrawal from the trial before surgery is a decision of the participant. However participants will be asked if the research team can still use the data collected during their participation in the research analyses.

## Protocol Deviations

All study and protocol deviations will be documented in the patients CRF and reported to the Principle Investigator, who will notify the Sponsor of any serious breaches. Patients will be analysed according to group allocation, by intent-to-treat analysis.

## Patient and Public Involvement

The project details were discussed at a national thoracic surgery patient group (RESOLVE) meeting and feedback regarding merit and acceptability of the proposed intervention were incorporated. Dissemination of results will occur via specific patient feedback events. A patient representative was an active contributor to the development of the trial and intervention and will be a member of the trial management group. The intervention including the web app 'Quit4Surgery' were designed to meet patients' specific 'needs' and 'drivers' of smokers who are waiting for thoracic surgery, with a PPI group involved in the design and initial product testing stages of this feasibility study.

## OUTCOME AND DATA COLLECTION

### Patient Recruitment into study

The overall aims of the feasibility are to find out if a larger trial is feasible. The quantitative measurements related to this include:

- Proportion of all elective thoracic procedures screened
- Proportion of eligible participants of those screened
- Proportion of eligible participants consented to receive intervention

In this feasibility study, selecting 5 units whose overall elective thoracic patient throughput amounts to 4000 patients a year, of whom 20% are smokers and 20% agree to take part in

1  
2  
3 the study. It is expected that 60 eligible patients will be recruited to the INT group and 60  
4 patients to the UC group of the study, with recruitment of 120 patients in total. Therefore the  
5 aim is to recruit 5 patients a month to each group over the 12 months recruitment period  
6 across all sites.  
7  
8  
9

### 10 **Patient Identification and Screening**

11  
12  
13  
14  
15 The proportion of patients screened for eligibility and recorded on a screening log will be  
16 assessed and reported as the proportion of patients screened from the total number of  
17 planned major thoracic surgery during the study period.  
18  
19

### 20 **Reasons for Failure to be Recruited**

21  
22  
23  
24 The proportion of patients that were missed, which should be minimal and proportion of  
25 patients who decline to take part will be recorded. Patients decline participation for many  
26 reasons, which should be captured whenever possible.  
27  
28  
29

### 30 **Education Material of Nurses and Surgeons**

31  
32  
33  
34 Feedback on the appropriateness, value and acceptability of the training will be elicited to  
35 enable refinement of the training programme for the substantive study, and to define a  
36 minimum competence. The training material will be evaluated for its ease of use, should it be  
37 used in the substantive study.  
38  
39  
40  
41

### 42 **Assessment of Data Collection Process**

43  
44  
45  
46 Data will be collected using a CRF and will include demographic information and co-  
47 morbidities. Postoperative complications will be defined by the European Society of Thoracic  
48 Surgery (ESTS) (31), Thoracic Morbidity and Mortality (TM&M) system (32) and the stEP-  
49 COMPAC Group (33); see online supplementary appendix for definitions. Hospital re-  
50 admission rate will be determined within 30 days of discharge.  
51  
52  
53

54  
55  
56 Assessment and identification will be made for loss of data during in-hospital stay to improve  
57 the data collection process for the substantive trial.  
58  
59  
60

## Smoking-related Outcomes

In the study the feasibility of the following questionnaires will be tested:

- Self-reported quit rate and exhaled CO measurement
- Fagerstrom Test for Nicotine Dependency: assessment of nicotine addiction (34).
- Mood and Physical Symptoms Scale (MPSS): assessment of cigarette withdrawal symptoms over the past 24 hours, including the strength of urge to smoke (35).
- Generic health related quality of life (EQ-5D-5L): assessment to provide a preference-based measure of health-related quality-of-life (36).
- NRT and support usage questionnaire.
- Health resource usage questionnaire: assessment of resource will be assessed via patient-recall with resources being measured including planned hospital overnight stays, planned hospital out-patient visits, hospital emergency visits, hospital admissions, GP and other community service visits.

## Acceptability to and Impact on Patients

All patients consenting to participate in the trial will be eligible for interview and selected using maximum variety sampling by age, sex, ethnicity, admitting diagnosis, surgical procedure and smoking status. Interviews will be conducted until saturation is achieved, which is likely to be around 25-30 patients across all sites (37). Telephone interviews will be conducted as to minimise impact to patients following major surgery, will last no longer than 60 minutes and will be audio recorded and transcribed by the researcher.

An interview guide will be developed using evidence from previous experience of running the rehabilitation and pain study, and based on the interview objectives: pre- and post-surgical experiences of patients receiving the intervention (including effectiveness of staff communication) and patient engagement with it, any unintended consequences, acceptability of the intervention to patients, and recommendations for how its use or content/design could be improved.

## Assessment of Trial Processes and Impact on Staff

Key HCPs in the clinical pathway will be invited to attend a focus group or individual interviews that will explore both the acceptability and recommendations for optimisation of the intervention.

1  
2  
3  
4  
5 Digitally recorded interviews and focus groups will be transcribed verbatim and anonymised.  
6  
7 Transcripts will be analysed for patients and staff separately following Braun and Clarke's  
8 method for thematic analysis. Analysis will take an iterative approach, where data collection  
9 and analysis occurs concurrently, allowing the topic guide to be modified throughout to  
10 reflect emergent and/or priority themes.  
11  
12

## 13 14 **STATISTICS AND DATA COLLECTION**

### 15 16 17 **Sample Size Calculation**

18  
19  
20 As this is a feasibility study no formal sample size calculation has been performed. An audit  
21 discussing sample size in pilot and feasibility studies concluded that while sample size  
22 justification is important, formal calculation may not be appropriate. The findings from the  
23 audit concluded that a median size of 30 in each arm is appropriate (38). The study will aim  
24 to enrol 60 participants in the INT group over 1 year as this is a sufficient number to estimate  
25 a proportion of patients who have quit smoking by the day of surgery (39), as well as to  
26 explore data collection processes, and inform sample size calculations for a potential larger  
27 trial. Recruitment of 60 participants in each group will allow us to measure recruitment and  
28 compliance rates with 95% confidence interval (CI) width between 10 and 20%. It would also  
29 be enough to estimate the standard deviation (SD) of questionnaires with reasonable  
30 accuracy for future planning of a larger trial.  
31  
32  
33  
34  
35  
36  
37  
38

### 39 **Data Analysis**

40  
41  
42  
43 Appropriate summary statistics (e.g. proportions and inter-quartile ranges, means and SDs)  
44 will be generated for the study feasibility and patient/clinical measures. Between-group  
45 measures (mean differences, etc.) will be generated alongside 95% CI, however formal  
46 hypothesis testing will not be carried out as the aim here is not to conclusively prove efficacy  
47 and furthermore the size of sample is too small for any inferential tests to be meaningful.  
48 Participants will be kept in the groups they were allocated, regardless of compliance with  
49 treatment (intention-to-treat protecting against attrition bias). Analysis will be completed once  
50 all participants have completed all follow-up assessments. All data used in publication will be  
51 in an anonymous format in order to maintain patient study participation confidential.  
52  
53  
54  
55  
56  
57  
58  
59  
60

## Handling Missing Data

A member of the research team will contact patients for any missing data (e.g. questionnaires) via telephone and post. Where patients attend for follow-up clinic, the potential for missing data will again be limited. Imputation of missing responses is not proposed for patient reported outcomes as this is not a definitive trial and no hypothesis testing will be performed.

## DATA MANAGEMENT AND QUALITY ASSURANCE

### Data management and confidentiality

Personal data will be collected from trial participants and hospital notes on CRFs, coded with the participant's unique trial number and initials. This will be held securely and strictly confidentially according to NHS policies. Patients in the semi-structured qualitative interviews will be consented specifically for their name, address and contact telephone number to be shared with University of Birmingham (UoB) and University College London. Data will be transferred securely by encrypted end-to-end email and will not be labelled with private identifiable information. Interview response information will be kept encrypted on a computer in a locked office. No data that could be used to identify an individual will be published. Data will be stored on a secure server under the provisions of the Data Protection Act and/or applicable laws and regulations. Data may be accessed by external regulatory agencies and the Study Sponsor representatives and permission for this access will be documented within the participants consent form.

### Monitoring and Audit

Onsite monitoring will be conducted as required by the UoB Clinical Research Compliance Team, with activities reported to the trials team and any issues noted followed-up to resolution. Additional on-site monitoring visits may be triggered, e.g. by poor CRF return, poor data quality, low AE reporting rates, excessive number of participant withdrawals/deviations. Study data and evidence of monitoring and systems audits will be made available for inspection by the regulatory authority as required.

## Long Term Storage of Data

Trial data will be stored archived after the formal closure of the trial in accordance with archive policy and for the appropriate duration as per current legislation.

## Data access

Upon completion and publication of the study, individual participant data will be shared that underlie the results reported in study after de-identification. Additional related documents will be available including the study protocol, statistical analysis plan and analytical code. This data will be available in the beginning 3 months and 5 years following article publication to those who provide a methodologically sound proposal for analysis to achieve the aims in the approved proposal. All proposals should be directed to [b.naidu@bham.ac.uk](mailto:b.naidu@bham.ac.uk). To gain access requestors will need to sign a data access agreement. Data will be available for 5 years at a third party website.

## SPONSORSHIP AND INDEMNITY

The UoB will act as the sponsor for this study. Delegated responsibilities will be assigned to the Chief Investigator and the NHS Trusts involved in the study. The UoB has in force a Public Liability Policy and/or Clinical Trials policy, which provides cover for claims for 'negligent harm' and the activities here are included within that coverage.

## ETHICS AND DISSEMINATION

This study has obtained ethical approval from the NHS West Midlands Black Country Research Ethics Committee (Protocol Version 3.0; REC number 19/WM/0097). This aim of this feasibility study is to inform a substantive trial. On completion, results will be published in a peer-review scientific journal. The feasibility study is registered on the clinical trial database (NCT04190966).

## REFERENCES

1. SCTS. National Thoracic Surgery Activity and Outcomes Report. 2018. <https://scts.org/wp-content/uploads/2019/03/Thoracic-Blue-Book-2018-FINAL.pdf> (accessed June 2020).
2. Agostini P, Lugg ST, Adams K, Vartsaba N, Kalkat MS, Rajesh PB, et al. Postoperative pulmonary complications and rehabilitation requirements following lobectomy: a propensity score matched study of patients undergoing video-assisted thoracoscopic surgery versus thoracotomy. *Interac Cardiovasc Thorac Surg*. 2017;24(6):931-7.
3. Agostini P, Cieslik H, Rathinam S, Bishay E, Kalkat MS, Rajesh PB, et al. Postoperative pulmonary complications following thoracic surgery: are there any modifiable risk factors? *Thorax*. 2010;65(9):815-8.
4. Lugg ST, Tikka T, Agostini PJ, Kerr A, Adams K, Kalkat MS, et al. Smoking and timing of cessation on postoperative pulmonary complications after curative-intent lung cancer surgery. *J Cardiothorac Surg*. 2017;12(1):52.
5. Parsons A, Daley A, Begh R, Aveyard P. Influence of smoking cessation after diagnosis of early stage lung cancer on prognosis: systematic review of observational studies with meta-analysis. *BMJ*. 2010;340:b5569.
6. NICE. Smoking: acute acute maternity and mental health services. Public Health Guideline [PH48]: 2013. <https://www.nice.org.uk/guidance/ph48> (accessed June 2020).
7. Thomsen T, Villebro N, Moller AM. Interventions for preoperative smoking cessation. *Cochrane Database Syst Rev*. 2014(3):CD002294.
8. Moller AM, Villebro N, Pedersen T, Tonnesen H. Effect of preoperative smoking intervention on postoperative complications: a randomised clinical trial. *Lancet*. 2002;359(9301):114-7.
9. Lindstrom D, Sadr Azodi O, Wladis A, Tonnesen H, Linder S, Nasell H, et al. Effects of a perioperative smoking cessation intervention on postoperative complications: a randomized trial. *Ann Surg*. 2008;248(5):739-45.
10. Webb J KA, Thickett D, Naidu B. Smoking habits of pre-surgery patients. *ERJ*. 2015;46: PA2511.
11. Warner DO, Klesges RC, Dale LC, Offord KP, Schroeder DR, Vickers KS, et al. Telephone quitlines to help surgical patients quit smoking patient and provider attitudes. *Am J Prev Med*. 2008;35(6 Suppl):S486-93.
12. Lee SM, Landry J, Jones PM, Buhrmann O, Morley-Forster P. Long-term quit rates after a perioperative smoking cessation randomized controlled trial. *Anesth and Analg*. 2015;120(3):582-7.
13. Farley A, Aveyard P, Kerr A, Naidu B, Dowswell G. Surgical lung cancer patients' views about smoking and support to quit after diagnosis: a qualitative study. *J Cancer Surviv*. 2016;10(2):312-9.
14. Park ER, Japuntich S, Temel J, Lanuti M, Pandiscio J, Hilgenberg J, et al. A smoking cessation intervention for thoracic surgery and oncology clinics: a pilot trial. *J Thoracic Oncol*. 2011;6(6):1059-65.
15. Rice VH, Heath L, Livingstone- Banks J, Hartmann- Boyce J. Nursing interventions for smoking cessation. *Cochrane Database Syst Rev*. 2017; Issue 12. Art. No: CD001188.
16. NICE. Lung cancer: diagnosis and management. NICE Guideline [CG121] 2011. <https://www.nice.org.uk/guidance/CG121> (accessed June 2020).
17. National Cancer Waiting Times Monitoring Dataset Guidance – Version 9.0. 2015. <http://www.swscn.org.uk/wp/wp-content/uploads/2018/11/Cancer-Waiting-Times-Guidance-v9.pdf> (accessed June 2020)..
18. Thornton L, Quinn C, Birrell L, Guillaumier A, Shaw B, Forbes E, et al. Free smoking cessation mobile apps available in Australia: a quality review and content analysis. *Aust N Z J Public Health*. 2017;41(6):625-30.
19. McBride CM, Ostroff JS. Teachable moments for promoting smoking cessation: the context of cancer care and survivorship. *Cancer Control*. 2003;10(4):325-33.
20. Shi Y, Warner DO. Surgery as a teachable moment for smoking cessation. *Anesthesiology*. 2010;112(1):102-7.
21. Hemming K, Haines TP, Chilton PJ, Girling AJ, Lilford RJ. The stepped wedge cluster randomised trial: rationale, design, analysis, and reporting. *BMJ*. 2015;350:h391.
22. What is Scrum? An Agile Framework for Completing Complex Projects - Scrum Alliance. Scrum Alliance. 2016.
23. A M. Strategy, Implementation, Organisation and People. Springer Verlag. 2015.



24. Michie S, Hyder N, Walia A, West R. Development of a taxonomy of behaviour change techniques used in individual behavioural support for smoking cessation. *Addict Behav.* 2011;36(4):315-9.
25. NCSCT. Standard Treatment Programme. 2012. <http://www.ncsct.co.uk/usr/pub/NCSCT%20STP.pdf> (accessed June 2020).
26. West R, Sohal T. "Catastrophic" pathways to smoking cessation: findings from national survey. *BMJ.* 2006;332(7539):458-60.
27. Ong KC, Cheong GN, Prabhakaran L, Earnest A. Predictors of success in smoking cessation among hospitalized patients. *Respirology.* 2005;10(1):63-9.
28. Sivarajan Froelicher ES, Miller NH, Christopherson DJ, Martin K, Parker KM, Amonetti M, et al. High rates of sustained smoking cessation in women hospitalized with cardiovascular disease: the Women's Initiative for Nonsmoking (WINS). *Circulation.* 2004;109(5):587-93.
29. BTS. Recommendations for hospital smoking cessation services for commissioners and health care professionals. 2012. [https://www.brit-thoracic.org.uk/media/70157/bts-recommendations-for-smoking-cessation-services\\_.pdf](https://www.brit-thoracic.org.uk/media/70157/bts-recommendations-for-smoking-cessation-services_.pdf) (accessed June 2020).
30. NCSCT. Electronic Cigarettes - A briefing for stop smoking services. 2016. [https://www.ncsct.co.uk/usr/pub/Electronic\\_cigarettes\\_-\\_A\\_briefing\\_for\\_stop\\_smoking\\_services.pdf](https://www.ncsct.co.uk/usr/pub/Electronic_cigarettes_-_A_briefing_for_stop_smoking_services.pdf) (accessed June 2020).
31. ESTS. Database Annual Report: Silver Book 2015. (accessed June 2020). [http://www.ests.org/\\_userfiles/pages/files/ESTS%20201Silver\\_Book\\_FULL\\_PEF.pdf](http://www.ests.org/_userfiles/pages/files/ESTS%20201Silver_Book_FULL_PEF.pdf).
32. Seely AJ, Ivanovic J, Threader J, Al-Hussaini A, Al-Shehab D, Ramsay T, et al. Systematic classification of morbidity and mortality after thoracic surgery. *Ann Thorac Surg.* 2010;90(3):936-42; discussion 42.
33. Abbott TEF, Fowler AJ, Pelosi P, Gama de Abreu M, Moller AM, Canet J, et al. A systematic review and consensus definitions for standardised end-points in perioperative medicine: pulmonary complications. *B J Anaesth.* 2018;120(5):1066-79.
34. Heatherton TF, Kozlowski LT, Frecker RC, Fagerstrom KO. The Fagerstrom Test for Nicotine Dependence: a revision of the Fagerstrom Tolerance Questionnaire. *Br J Addict.* 1991;86(9):1119-27.
35. West R, Hajek P. Evaluation of the mood and physical symptoms scale (MPSS) to assess cigarette withdrawal. *Psychopharmacology.* 2004;177(1-2):195-9.
36. EuroQol--a new facility for the measurement of health-related quality of life. *Health Policy.* 1990;16(3):199-208.
37. Morse JM. Analytic Strategies and Sample Size. *Qual Health Res.* 2015;25(10):1317-8.
38. Billingham SA, Whitehead AL, Julious SA. An audit of sample sizes for pilot and feasibility trials being undertaken in the United Kingdom registered in the United Kingdom Clinical Research Network database. *BMC Med Res Methodol.* 2013;13:104.
39. Browne RH. On the use of a pilot sample for sample size determination. *Stat Med.* 1995;14(17):1933-40.

Author Contributions: All authors have made substantial contributions to the conception or design of the work, or acquisition, analysis or interpretation of the data. STL has participated in the study design, intervention development and drafted the manuscript. SK, AK and AB have participated in the intervention development. AF, OP, JB, RW, DRT, and BN have participated in the study design, intervention development and have critically revised the manuscript. All authors have approved the final version.

Funding: The research costs of the trial are funded by an investigator-initiated study grant from Johnson and Johnson (Grant #IIS-ENG-2017-01).

Competing Interests: None declared.

Word Count: 4062



## Figure 1: Trial Schema

### Table 1: Summary of investigations and assessments

|                                                     | Participants             |                       | Time points                      |                |                      |                           |                         |                            |
|-----------------------------------------------------|--------------------------|-----------------------|----------------------------------|----------------|----------------------|---------------------------|-------------------------|----------------------------|
|                                                     | Intervention Group (INT) | Usual Care Group (UC) | Baseline clinic prior to surgery | Day of surgery | During hospital Stay | Day of hospital discharge | One month after surgery | Six months after enrolment |
| Eligibility and written informed consent            | X                        | X                     | X                                |                |                      |                           |                         |                            |
| Demographic Data <sup>1</sup>                       | X                        | X                     | X                                |                |                      |                           |                         |                            |
| Previous Medical History <sup>2</sup>               | X                        | X                     | X                                |                |                      |                           |                         |                            |
| Self-reported Quit rate                             | X                        | X                     | X                                | X              |                      | X                         | X                       | X                          |
| Exhaled CO measurement                              | X                        | X                     | X                                | X              |                      | X                         | X                       | X                          |
| NRT and support usage questionnaire                 | X                        | X                     | X                                | X              |                      | X                         | X                       | X                          |
| Fagerstrom Test for Nicotine Dependence             | X                        | X                     | X                                |                |                      |                           | X                       |                            |
| Mood and Physical Symptoms Scale                    | X                        |                       | X                                | X              |                      | X                         | X                       |                            |
| EQ-5D-5L                                            | X                        |                       | X                                |                |                      |                           | X                       |                            |
| Health resource usage questionnaire                 | X                        |                       |                                  |                |                      |                           | X                       |                            |
| Surgery and anesthetic data <sup>3</sup>            | X                        | X                     |                                  | X              |                      |                           |                         |                            |
| Postoperative complications <sup>4,5</sup>          | X                        | X                     |                                  |                | X                    | X                         | X                       |                            |
| Hospital readmission <sup>6</sup>                   | X                        | X                     |                                  |                |                      |                           | X                       |                            |
| Semi structured qualitative interviews <sup>7</sup> | X                        | X                     |                                  |                |                      |                           | X                       |                            |
| Adverse events                                      | <i>If applicable</i>     |                       |                                  |                |                      |                           |                         |                            |
| Protocol deviations                                 | <i>If applicable</i>     |                       |                                  |                |                      |                           |                         |                            |

- 1) Demographic data: gender, age, indication for surgery, height, weight, BMI, ASA grade, ECOG score, dyspnoea score, recent lung function.
- 2) Previous medical history: smoking history, alcohol intake per week, co-morbidities (COPD, Ischaemic Heart Disease, Congestive Cardiac Failure, Hypertension, diabetes (diet-controlled/ oral therapy/ insulin), renal failure, previous stroke, thyroid disease (hyperthyroid/ hypothyroid).
- 3) Operation performed (side of surgery, operation, surgical technique).
- 4) **Post-operative data and observations:** Routine blood results if done (full blood count, albumin, renal function, electrolytes, CRP)

1  
2  
3 **Acute complications:** According to ESTS (30) (Appendix A) and Thoracic Morbidity and  
4 Mortality Classification (31) (Appendix B), data also collected including admission and  
5 length of stay on the ward (0), step-down (1), the HDU (2) and ITU (3). Data will also be  
6 collected in patients requiring mini-tracheostomy or additional surgery.

7  
8 **Post-operative pulmonary complications:** Using stEP-COMPAC Group definition of  
9 postoperative pulmonary complications (32) (Appendix C) defining atelectasis (detected  
10 on computer tomography/CXR), pneumonia (using US Centres for Disease Control  
11 criteria), acute respiratory distress syndrome (using Berlin Consensus), and pulmonary  
12 aspiration (clear clinical history and radiological evidence).

- 13  
14 5) Discharge data: total hospital stay, home with flutter bag, histology data and mortality.  
15 6) Follow-up: hospital readmission up to and including one month following surgery.  
16 7) At 4-8 weeks post-surgery patients will also have semi-structured qualitative patient  
17 interviews will be undertaken at 4 weeks post discharge to investigate experience,  
18 engagement, acceptability, unintended consequences/benefits and how to optimise the  
19 intervention delivery.  
20  
21  
22  
23  
24  
25  
26  
27  
28  
29  
30  
31  
32  
33  
34  
35  
36  
37  
38  
39  
40  
41  
42  
43  
44  
45  
46  
47  
48  
49  
50  
51  
52  
53  
54  
55  
56  
57  
58  
59  
60

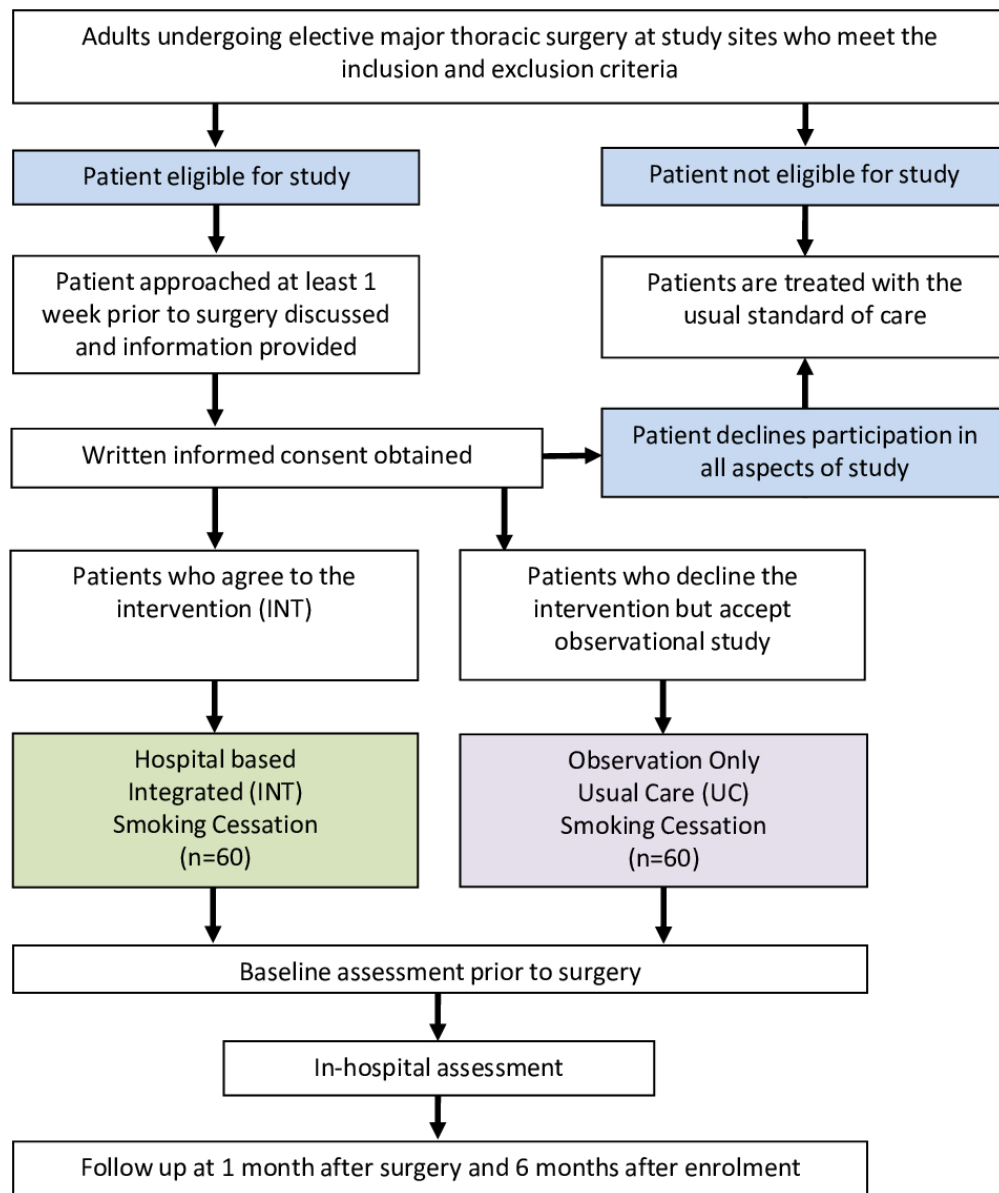

Trial Schema

80x95mm (300 x 300 DPI)

## APPENDIX

### Appendix A – Major cardiopulmonary complications as classified by the European Society of Thoracic Surgeons (ESTS)

**ARDS:** Adult respiratory distress syndrome defined according to the American-European consensus conference. All of the following criteria should be met:

1. Acute onset
2. Arterial hypoxemia with PaO<sub>2</sub>/FIO<sub>2</sub> ratio lower than 200 (regardless PEEP level)
3. Bilateral infiltrates at chest radiograph or CT scan
4. No clinical evidence of left atrial hypertension or pulmonary artery occlusive pressure <18 mmHg
5. Compatible risk factors

**Atrial Arrhythmia:** new onset of atrial fibrillation/flutter (AF) requiring medical treatment or cardioversion. Does not include recurrence of AF which had been present preoperatively.

**Ventricular Arrhythmia:** sustained ventricular tachycardia or ventricular fibrillation that has been clinically documented and treated by ablation therapy, implantable cardioverter defibrillator, permanent pacemaker, pharmacologic treatment or cardioversion.

**Bronchoscopy for atelectasis:** postoperative atelectasis documented clinically or radiographically that needed bronchoscopy.

**Pneumonia:** defined according to the last CDC criteria. Two or more serial chest radiographs with at least **one** of the following:

- New or progressive and persistent infiltrate
- Consolidation
- Cavitation

**AND** at least **one** of the following:

- Fever (>38°C or >100.4°F) with no other recognized cause
- Leukopenia (<4000 WBC/mm<sup>3</sup>) or leukocytosis (>12,000 WBC/mm<sup>3</sup>)
- For adults >70 years old, altered mental status with no other recognized cause

**AND** at least **two** of the following:

- New onset of purulent sputum, or change in character of sputum, or increased respiratory secretions, or increased suctioning requirements
- New onset or worsening cough, or dyspnea, or tachypnea

- 1  
2  
3 • Rales or bronchial breath sounds Worsening gas exchange (e.g. O<sub>2</sub> desaturations (e.g.,  
4 PaO<sub>2</sub>/FiO<sub>2</sub> < 240), increased oxygen requirements, or increased ventilator demand).  
5  
6  
7

8 **Pulmonary embolism:** confirmed by V/Q scan, angiogram or CT scan.  
9

10  
11 **DVT:** deep venous thrombosis confirmed by Doppler study, contrast study or other study  
12 and that required treatment.  
13  
14

15  
16 **Myocardial infarct:** evidenced by one of the following criteria:

- 17  
18 1. Transmural infarction diagnosed by the appearance of a new Q wave in two or more  
19 contiguous leads on ECG.  
20  
21 2. Subendocardial infarction (non Q wave) evidenced by clinical, angiographic  
22 electrocardiographic signs.  
23  
24 3. Laboratory isoenzyme evidence of myocardial necrosis.  
25  
26

27 **Renal failure:** defined as the onset of new renal failure in the postoperative period according  
28 to one of the following criteria:  
29

- 30 1. Increase of serum creatinine to greater than 2.0, and 2-fold the preoperative  
31 creatinine level.  
32  
33 2. A new requirement for dialysis postoperatively.  
34  
35

36 **Neurological complication:** occurrence of one of the following central neurologic  
37 postoperative events not present preoperatively:  
38

- 39 1. A central neurologic deficit persisting postoperatively for more than 72 hours  
40  
41 2. A transient neurologic deficit (transient ischemic attack or reversible ischemic  
42 neurological deficit) with recovery within 72 hours  
43  
44 3. A new postoperative coma persisting at least 24 hours and caused by  
45 anoxic/ischemic and/or metabolic encephalopathy, thromboembolic event or cerebral  
46 bleed  
47  
48  
49  
50  
51  
52  
53  
54  
55  
56  
57  
58  
59  
60

## Appendix B – Seeley Systematic Classification of Morbidity and Mortality After Thoracic Surgery (TM &M) Classification of Severity

Complication: Any deviation from the normal postoperative course.

| <b>Minor</b>     |                                                                                                 |
|------------------|-------------------------------------------------------------------------------------------------|
| Grade I          | Any complication without need for pharmacologic treatment or other intervention.                |
| Grade II         | Any complication that requires pharmacologic treatment or minor intervention only.              |
| <b>Major</b>     |                                                                                                 |
| Grade III        | Any complication that requires surgical, radiologic, endoscopic intervention, or multi-therapy. |
| Grade IIIa       | Intervention does not require general anaesthesia.                                              |
| Grade IIIb       | Intervention requires general anaesthesia.                                                      |
| Grade IV         | Any complication requiring intensive care unit management and life support.                     |
| Grade IVa        | Single organ dysfunction.                                                                       |
| Grade IVb        | Multi-organ dysfunction.                                                                        |
| <b>Mortality</b> |                                                                                                 |
| Grade V          | Any complication leading to the death of the patient.                                           |

## Appendix C – StEP Core Outcome Measures in Perioperative and Anaesthetic Care (COMPAC) – Post-operative Pulmonary Complications

### Post-operative Pulmonary Complications\*

Composite of respiratory diagnoses that share common pathophysiological mechanisms including pulmonary collapse and airway contamination:

- (i) atelectasis detected on computed tomography or chest radiograph,
- (ii) pneumonia using US Centers for Disease Control criteria,
- (iii) Acute Respiratory Distress Syndrome using Berlin consensus definition,
- (iv) pulmonary aspiration (clear clinical history **AND** radiological evidence).

### \*Exclusions

Other diagnoses that do not share a common biological mechanism are best evaluated separately and only when clearly relevant to the treatment under investigation:

- (i) pulmonary embolism,
- (ii) pleural effusion,
- (iii) cardiogenic pulmonary oedema,
- (iv) pneumothorax,
- (v) bronchospasm.

### ARDS - Berlin definition

Timing: within 1 week of a known clinical insult or new or worsening respiratory symptoms  
**AND** Chest imaging: bilateral opacities not fully explained by effusions, lobar/lung collapse or nodules

**AND** Origin of oedema: respiratory failure not fully explained by cardiac failure or fluid overload (requires objective assessment, e.g. echocardiography, to exclude hydrostatic oedema),

**AND** Oxygenation:

Mild  $\text{PaO}_2:\text{FiO}_2$  between 26.7 - 40.0 kPa (200-300 mm Hg) with PEEP or CPAP  $\geq 5$  cm  $\text{H}_2\text{O}$ ;

Moderate  $\text{PaO}_2:\text{FiO}_2$  between 13.3 - 26.6 kPa (100-200 mm Hg) with PEEP  $\geq 5$  cm  $\text{H}_2\text{O}$ ;

Severe  $\text{PaO}_2:\text{FiO}_2 \leq 13.3$  kPa (100 mm Hg) with PEEP  $\geq 5$  cm  $\text{H}_2\text{O}$ .

### Mechanical ventilation:

The need for need for tracheal re-intubation and mechanical ventilation after extubation, and within 30 days after surgery OR mechanical ventilation for more than 24 h after surgery. The inclusion of non-invasive ventilation may be considered on a study-by-study basis.

## Post-operative Pneumonia

Two or more serial chest radiographs with at least one of the following (one radiograph is sufficient for patients with no underlying pulmonary or cardiac disease):

- (i) New or progressive and persistent infiltrates,
- (ii) consolidation
- (iii) cavitation;

**AND** at least **one** of the following:

- (a) fever ( $>38^{\circ}\text{C}$ ) with no other recognised cause,
- (b) leucopaenia (white cell count  $<4 \times 10^9/l$ ) or leucocytosis (white cell count  $>12 \times 10^9/l$ ),
- (c) for adults  $>70$  years old, altered mental status with no other recognised cause;

**AND** at least **two** of the following:

- (a) new onset of purulent sputum or change in character of sputum, or increased respiratory secretions, or increased suctioning requirements,
- (b) new onset or worsening cough, or dyspnoea, or tachypnoea,
- (c) rales or bronchial breath sounds,
- (d) worsening gas exchange (hypoxaemia, increased oxygen requirement, increased ventilator demand).



[Insert Hospital Logo]

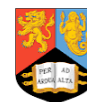

UNIVERSITY OF BIRMINGHAM

Study Number \_\_\_\_\_ Site Number \_\_\_\_\_

**A trial to study the effectiveness of sMoking cessation in the sURgical pathway befoRe mAJor lung sugerY: Project MURRAY: Feasibility Study**

**Participant Consent Form: Version 2.0**

**Principal Investigator:**

**Please initial box**

1. I confirm that I have read and understand the patient information sheet (Version\_\_Date\_\_/\_/\_/\_\_) for the above study. I have had the opportunity to consider the information, ask questions and have had these answered satisfactorily.
2. I understand that my participation is voluntary and that I am free to withdraw at anytime without giving any reason, without my medical care or legal rights being affected. I give permission for data collected up until the point that I withdraw to be used in the research analysis.
3. I understand that relevant sections of my medical notes and data collected during the study may be looked at by individuals from the research team, from regulatory authorities or from the NHS Trust, where it is relevant to my taking part in this research. I give permission for these individuals to have access to my records.
4. I agree to be contacted either by telephone or post by a researcher to complete the research questionnaires at 4-8 weeks after surgery.
5. I agree for my GP to be informed of my participation in the study.
6. Optional – please choose option A) or B)
  - A) I agree to take part in the interventional part of the study (including hospital based Intensive smoking cessation support).
  - B) I do not wish to take part in the interventional part of the study but I do agree to take part in the observational part of the study (including standard smoking cessation support).
7. Optional - I agree for my name, address and contact details to be shared with the University of Birmingham and University College London, to be interviewed with audio recording and transcription at 4-8 weeks after surgery to discuss my treatment and participation in the study. I give permission that my anonymous quotes may be used in the reporting of the study. YES / NO
8. I agree for my data to be used for ethically approved future research in lung surgery.

|                            |             |                  |
|----------------------------|-------------|------------------|
|                            |             |                  |
| <b>Name of Participant</b> | <b>Date</b> | <b>Signature</b> |

Name of Person taking consent      Date      Signature  
 When completed: 1 for participant; 1 for researcher site file; 1 (original) to be kept in medical notes.

Insert Hospital Logo]

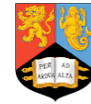UNIVERSITY OF  
BIRMINGHAM

Study Number \_\_\_\_\_ Site Number \_\_\_\_\_

**A trial to study the effectiveness of sMoking cessation in the sURgical pathway befoRe mAJor lung sugerY Project MURRAY: Feasibility Study**

**Consent Form: Staff interview: Version 2.0**

**Principal Investigator:**

Please initial box

1. I confirm that I have read and understand the participant information sheet Version \_\_\_\_ Date \_\_/\_\_/\_\_ concerning my participation in an interview/focus group for the above study. I have had the opportunity to consider the information, ask questions and have had these answered satisfactorily.
2. I understand that my participation is voluntary and that I am free to withdraw at anytime without giving any reason, without my medical care or legal rights being affected. I give permission for data collected up until the point that I withdraw to be used in the research analysis.
3. I agree for my personal information including name, address and phone number to be shared with the University of Birmingham and University College London to be interviewed with audio recording and transcription.
4. I give permission that my anonymous quotes may be used in the reporting of the study.
5. I agree to be interviewed/participate in a focus group for the above study.

\_\_\_\_\_  
**Name of Participant**\_\_\_\_\_  
**Date**\_\_\_\_\_  
**Signature**\_\_\_\_\_  
Name of Person  
taking consent\_\_\_\_\_  
Date\_\_\_\_\_  
Signature

When completed: 1 for participant; 1 for researcher site file; 1 (original) to be kept in medical notes.

# Reporting checklist for protocol of a clinical trial.

Based on the SPIRIT guidelines.

## Instructions to authors

Complete this checklist by entering the page numbers from your manuscript where readers will find each of the items listed below.

Your article may not currently address all the items on the checklist. Please modify your text to include the missing information. If you are certain that an item does not apply, please write "n/a" and provide a short explanation.

Upload your completed checklist as an extra file when you submit to a journal.

In your methods section, say that you used the SPIRIT reporting guidelines, and cite them as:

Chan A-W, Tetzlaff JM, Altman DG, Laupacis A, Gøtzsche PC, Krleža-Jerić K, Hróbjartsson A, Mann H, Dickersin K, Berlin J, Doré C, Parulekar W, Summerskill W, Groves T, Schulz K, Sox H, Rockhold FW, Rennie D, Moher D. SPIRIT 2013 Statement: Defining standard protocol items for clinical trials. *Ann Intern Med.* 2013;158(3):200-207

|                                             |                     | Reporting Item                                                                                               | Page Number |
|---------------------------------------------|---------------------|--------------------------------------------------------------------------------------------------------------|-------------|
| <b>Administrative information</b>           |                     |                                                                                                              |             |
| Title                                       | <a href="#">#1</a>  | Descriptive title identifying the study design, population, interventions, and, if applicable, trial acronym | 1           |
| Trial registration                          | <a href="#">#2a</a> | Trial identifier and registry name. If not yet registered, name of intended registry                         | 1           |
| Trial registration: data set                | <a href="#">#2b</a> | All items from the World Health Organization Trial Registration Data Set                                     | 1           |
| Protocol version                            | <a href="#">#3</a>  | Date and version identifier                                                                                  | 16          |
| Funding                                     | <a href="#">#4</a>  | Sources and types of financial, material, and other support                                                  | 16          |
| Roles and responsibilities: contributorship | <a href="#">#5a</a> | Names, affiliations, and roles of protocol contributors                                                      | 16          |

|    |                           |                     |                                                                    |    |
|----|---------------------------|---------------------|--------------------------------------------------------------------|----|
| 1  | Roles and                 | <a href="#">#5b</a> | Name and contact information for the trial sponsor                 | 1  |
| 2  | responsibilities:         |                     |                                                                    |    |
| 3  | sponsor contact           |                     |                                                                    |    |
| 4  | information               |                     |                                                                    |    |
| 5  |                           |                     |                                                                    |    |
| 6  |                           |                     |                                                                    |    |
| 7  |                           |                     |                                                                    |    |
| 8  | Roles and                 | <a href="#">#5c</a> | Role of study sponsor and funders, if any, in study design;        | 16 |
| 9  | responsibilities:         |                     | collection, management, analysis, and interpretation of data;      |    |
| 10 | sponsor and funder        |                     | writing of the report; and the decision to submit the report for   |    |
| 11 |                           |                     | publication, including whether they will have ultimate authority   |    |
| 12 |                           |                     | over any of these activities                                       |    |
| 13 |                           |                     |                                                                    |    |
| 14 |                           |                     |                                                                    |    |
| 15 |                           |                     |                                                                    |    |
| 16 | Roles and                 | <a href="#">#5d</a> | Composition, roles, and responsibilities of the coordinating       | 16 |
| 17 | responsibilities:         |                     | centre, steering committee, endpoint adjudication committee,       |    |
| 18 | committees                |                     | data management team, and other individuals or groups              |    |
| 19 |                           |                     | overseeing the trial, if applicable (see Item 21a for data         |    |
| 20 |                           |                     | monitoring committee)                                              |    |
| 21 |                           |                     |                                                                    |    |
| 22 |                           |                     |                                                                    |    |
| 23 |                           |                     |                                                                    |    |
| 24 | <b>Introduction</b>       |                     |                                                                    |    |
| 25 |                           |                     |                                                                    |    |
| 26 |                           |                     |                                                                    |    |
| 27 | Background and            | <a href="#">#6a</a> | Description of research question and justification for undertaking | 4  |
| 28 | rationale                 |                     | the trial, including summary of relevant studies (published and    |    |
| 29 |                           |                     | unpublished) examining benefits and harms for each intervention    |    |
| 30 |                           |                     |                                                                    |    |
| 31 |                           |                     |                                                                    |    |
| 32 | Background and            | <a href="#">#6b</a> | Explanation for choice of comparators                              | 5  |
| 33 | rationale: choice of      |                     |                                                                    |    |
| 34 | comparators               |                     |                                                                    |    |
| 35 |                           |                     |                                                                    |    |
| 36 |                           |                     |                                                                    |    |
| 37 | Objectives                | <a href="#">#7</a>  | Specific objectives or hypotheses                                  | 6  |
| 38 |                           |                     |                                                                    |    |
| 39 |                           |                     |                                                                    |    |
| 40 | Trial design              | <a href="#">#8</a>  | Description of trial design including type of trial (eg, parallel  | 7  |
| 41 |                           |                     | group, crossover, factorial, single group), allocation ratio, and  |    |
| 42 |                           |                     | framework (eg, superiority, equivalence, non-inferiority,          |    |
| 43 |                           |                     | exploratory)                                                       |    |
| 44 |                           |                     |                                                                    |    |
| 45 |                           |                     |                                                                    |    |
| 46 | <b>Methods:</b>           |                     |                                                                    |    |
| 47 | <b>Participants,</b>      |                     |                                                                    |    |
| 48 | <b>interventions, and</b> |                     |                                                                    |    |
| 49 | <b>outcomes</b>           |                     |                                                                    |    |
| 50 |                           |                     |                                                                    |    |
| 51 |                           |                     |                                                                    |    |
| 52 |                           |                     |                                                                    |    |
| 53 | Study setting             | <a href="#">#9</a>  | Description of study settings (eg, community clinic, academic      | 7  |
| 54 |                           |                     | hospital) and list of countries where data will be collected.      |    |
| 55 |                           |                     | Reference to where list of study sites can be obtained             |    |
| 56 |                           |                     |                                                                    |    |
| 57 |                           |                     |                                                                    |    |
| 58 |                           |                     |                                                                    |    |
| 59 |                           |                     |                                                                    |    |
| 60 |                           |                     |                                                                    |    |

|    |                              |                      |                                                                                                                                                                                                                                                                                                                                                                                |     |
|----|------------------------------|----------------------|--------------------------------------------------------------------------------------------------------------------------------------------------------------------------------------------------------------------------------------------------------------------------------------------------------------------------------------------------------------------------------|-----|
| 1  | Eligibility criteria         | <a href="#">#10</a>  | Inclusion and exclusion criteria for participants. If applicable, eligibility criteria for study centres and individuals who will perform the interventions (eg, surgeons, psychotherapists)                                                                                                                                                                                   | 8   |
| 2  |                              |                      |                                                                                                                                                                                                                                                                                                                                                                                |     |
| 3  |                              |                      |                                                                                                                                                                                                                                                                                                                                                                                |     |
| 4  |                              |                      |                                                                                                                                                                                                                                                                                                                                                                                |     |
| 5  |                              |                      |                                                                                                                                                                                                                                                                                                                                                                                |     |
| 6  | Interventions:               | <a href="#">#11a</a> | Interventions for each group with sufficient detail to allow replication, including how and when they will be administered                                                                                                                                                                                                                                                     | 9   |
| 7  | description                  |                      |                                                                                                                                                                                                                                                                                                                                                                                |     |
| 8  |                              |                      |                                                                                                                                                                                                                                                                                                                                                                                |     |
| 9  |                              |                      |                                                                                                                                                                                                                                                                                                                                                                                |     |
| 10 | Interventions:               | <a href="#">#11b</a> | Criteria for discontinuing or modifying allocated interventions for a given trial participant (eg, drug dose change in response to harms, participant request, or improving / worsening disease)                                                                                                                                                                               | 9   |
| 11 | modifications                |                      |                                                                                                                                                                                                                                                                                                                                                                                |     |
| 12 |                              |                      |                                                                                                                                                                                                                                                                                                                                                                                |     |
| 13 |                              |                      |                                                                                                                                                                                                                                                                                                                                                                                |     |
| 14 |                              |                      |                                                                                                                                                                                                                                                                                                                                                                                |     |
| 15 | Interventions:               | <a href="#">#11c</a> | Strategies to improve adherence to intervention protocols, and any procedures for monitoring adherence (eg, drug tablet return; laboratory tests)                                                                                                                                                                                                                              | 9   |
| 16 | adherence                    |                      |                                                                                                                                                                                                                                                                                                                                                                                |     |
| 17 |                              |                      |                                                                                                                                                                                                                                                                                                                                                                                |     |
| 18 |                              |                      |                                                                                                                                                                                                                                                                                                                                                                                |     |
| 19 |                              |                      |                                                                                                                                                                                                                                                                                                                                                                                |     |
| 20 |                              |                      |                                                                                                                                                                                                                                                                                                                                                                                |     |
| 21 | Interventions:               | <a href="#">#11d</a> | Relevant concomitant care and interventions that are permitted or prohibited during the trial                                                                                                                                                                                                                                                                                  | 9   |
| 22 | concomitant care             |                      |                                                                                                                                                                                                                                                                                                                                                                                |     |
| 23 |                              |                      |                                                                                                                                                                                                                                                                                                                                                                                |     |
| 24 |                              |                      |                                                                                                                                                                                                                                                                                                                                                                                |     |
| 25 | Outcomes                     | <a href="#">#12</a>  | Primary, secondary, and other outcomes, including the specific measurement variable (eg, systolic blood pressure), analysis metric (eg, change from baseline, final value, time to event), method of aggregation (eg, median, proportion), and time point for each outcome. Explanation of the clinical relevance of chosen efficacy and harm outcomes is strongly recommended | 6   |
| 26 |                              |                      |                                                                                                                                                                                                                                                                                                                                                                                |     |
| 27 |                              |                      |                                                                                                                                                                                                                                                                                                                                                                                |     |
| 28 |                              |                      |                                                                                                                                                                                                                                                                                                                                                                                |     |
| 29 |                              |                      |                                                                                                                                                                                                                                                                                                                                                                                |     |
| 30 |                              |                      |                                                                                                                                                                                                                                                                                                                                                                                |     |
| 31 |                              |                      |                                                                                                                                                                                                                                                                                                                                                                                |     |
| 32 |                              |                      |                                                                                                                                                                                                                                                                                                                                                                                |     |
| 33 |                              |                      |                                                                                                                                                                                                                                                                                                                                                                                |     |
| 34 | Participant timeline         | <a href="#">#13</a>  | Time schedule of enrolment, interventions (including any run-ins and washouts), assessments, and visits for participants. A schematic diagram is highly recommended (see Figure)                                                                                                                                                                                               | 7   |
| 35 |                              |                      |                                                                                                                                                                                                                                                                                                                                                                                |     |
| 36 |                              |                      |                                                                                                                                                                                                                                                                                                                                                                                |     |
| 37 |                              |                      |                                                                                                                                                                                                                                                                                                                                                                                |     |
| 38 |                              |                      |                                                                                                                                                                                                                                                                                                                                                                                |     |
| 39 |                              |                      |                                                                                                                                                                                                                                                                                                                                                                                |     |
| 40 | Sample size                  | <a href="#">#14</a>  | Estimated number of participants needed to achieve study objectives and how it was determined, including clinical and statistical assumptions supporting any sample size calculations                                                                                                                                                                                          | 14  |
| 41 |                              |                      |                                                                                                                                                                                                                                                                                                                                                                                |     |
| 42 |                              |                      |                                                                                                                                                                                                                                                                                                                                                                                |     |
| 43 |                              |                      |                                                                                                                                                                                                                                                                                                                                                                                |     |
| 44 |                              |                      |                                                                                                                                                                                                                                                                                                                                                                                |     |
| 45 | Recruitment                  | <a href="#">#15</a>  | Strategies for achieving adequate participant enrolment to reach target sample size                                                                                                                                                                                                                                                                                            | 11  |
| 46 |                              |                      |                                                                                                                                                                                                                                                                                                                                                                                |     |
| 47 |                              |                      |                                                                                                                                                                                                                                                                                                                                                                                |     |
| 48 |                              |                      |                                                                                                                                                                                                                                                                                                                                                                                |     |
| 49 | <b>Methods: Assignment</b>   |                      |                                                                                                                                                                                                                                                                                                                                                                                |     |
| 50 | <b>of interventions (for</b> |                      |                                                                                                                                                                                                                                                                                                                                                                                |     |
| 51 | <b>controlled trials)</b>    |                      |                                                                                                                                                                                                                                                                                                                                                                                |     |
| 52 |                              |                      |                                                                                                                                                                                                                                                                                                                                                                                |     |
| 53 |                              |                      |                                                                                                                                                                                                                                                                                                                                                                                |     |
| 54 | Allocation: sequence         | <a href="#">#16a</a> | Method of generating the allocation sequence (eg, computer-generated random numbers), and list of any factors for stratification. To reduce predictability of a random sequence, details of any planned restriction (eg, blocking) should be                                                                                                                                   | n/a |
| 55 | generation                   |                      |                                                                                                                                                                                                                                                                                                                                                                                |     |
| 56 |                              |                      |                                                                                                                                                                                                                                                                                                                                                                                |     |
| 57 |                              |                      |                                                                                                                                                                                                                                                                                                                                                                                |     |
| 58 |                              |                      |                                                                                                                                                                                                                                                                                                                                                                                |     |
| 59 |                              |                      |                                                                                                                                                                                                                                                                                                                                                                                |     |
| 60 |                              |                      |                                                                                                                                                                                                                                                                                                                                                                                |     |

provided in a separate document that is unavailable to those who enrol participants or assign interventions

|                                                           |                      |                                                                                                                                                                                                                                                                                                                                                                                                              |     |
|-----------------------------------------------------------|----------------------|--------------------------------------------------------------------------------------------------------------------------------------------------------------------------------------------------------------------------------------------------------------------------------------------------------------------------------------------------------------------------------------------------------------|-----|
| Allocation concealment mechanism                          | <a href="#">#16b</a> | Mechanism of implementing the allocation sequence (eg, central telephone; sequentially numbered, opaque, sealed envelopes), describing any steps to conceal the sequence until interventions are assigned                                                                                                                                                                                                    | n/a |
| Allocation: implementation                                | <a href="#">#16c</a> | Who will generate the allocation sequence, who will enrol participants, and who will assign participants to interventions                                                                                                                                                                                                                                                                                    | n/a |
| Blinding (masking)                                        | <a href="#">#17a</a> | Who will be blinded after assignment to interventions (eg, trial participants, care providers, outcome assessors, data analysts), and how                                                                                                                                                                                                                                                                    | n/a |
| Blinding (masking): emergency unblinding                  | <a href="#">#17b</a> | If blinded, circumstances under which unblinding is permissible, and procedure for revealing a participant's allocated intervention during the trial                                                                                                                                                                                                                                                         | n/a |
| <b>Methods: Data collection, management, and analysis</b> |                      |                                                                                                                                                                                                                                                                                                                                                                                                              |     |
| Data collection plan                                      | <a href="#">#18a</a> | Plans for assessment and collection of outcome, baseline, and other trial data, including any related processes to promote data quality (eg, duplicate measurements, training of assessors) and a description of study instruments (eg, questionnaires, laboratory tests) along with their reliability and validity, if known. Reference to where data collection forms can be found, if not in the protocol | 12  |
| Data collection plan: retention                           | <a href="#">#18b</a> | Plans to promote participant retention and complete follow-up, including list of any outcome data to be collected for participants who discontinue or deviate from intervention protocols                                                                                                                                                                                                                    | 14  |
| Data management                                           | <a href="#">#19</a>  | Plans for data entry, coding, security, and storage, including any related processes to promote data quality (eg, double data entry; range checks for data values). Reference to where details of data management procedures can be found, if not in the protocol                                                                                                                                            | 15  |
| Statistics: outcomes                                      | <a href="#">#20a</a> | Statistical methods for analysing primary and secondary outcomes. Reference to where other details of the statistical analysis plan can be found, if not in the protocol                                                                                                                                                                                                                                     | 14  |

|    |                            |                      |                                                                    |    |
|----|----------------------------|----------------------|--------------------------------------------------------------------|----|
| 1  | Statistics: additional     | <a href="#">#20b</a> | Methods for any additional analyses (eg, subgroup and adjusted     | 14 |
| 2  | analyses                   |                      | analyses)                                                          |    |
| 3  |                            |                      |                                                                    |    |
| 4  | Statistics: analysis       | <a href="#">#20c</a> | Definition of analysis population relating to protocol non-        | 14 |
| 5  | population and missing     |                      | adherence (eg, as randomised analysis), and any statistical        |    |
| 6  | data                       |                      | methods to handle missing data (eg, multiple imputation)           |    |
| 7  |                            |                      |                                                                    |    |
| 8  |                            |                      |                                                                    |    |
| 9  |                            |                      |                                                                    |    |
| 10 | <b>Methods: Monitoring</b> |                      |                                                                    |    |
| 11 |                            |                      |                                                                    |    |
| 12 | Data monitoring:           | <a href="#">#21a</a> | Composition of data monitoring committee (DMC); summary of         | 15 |
| 13 | formal committee           |                      | its role and reporting structure; statement of whether it is       |    |
| 14 |                            |                      | independent from the sponsor and competing interests; and          |    |
| 15 |                            |                      | reference to where further details about its charter can be found, |    |
| 16 |                            |                      | if not in the protocol. Alternatively, an explanation of why a     |    |
| 17 |                            |                      | DMC is not needed                                                  |    |
| 18 |                            |                      |                                                                    |    |
| 19 |                            |                      |                                                                    |    |
| 20 |                            |                      |                                                                    |    |
| 21 |                            |                      |                                                                    |    |
| 22 | Data monitoring:           | <a href="#">#21b</a> | Description of any interim analyses and stopping guidelines,       | 15 |
| 23 | interim analysis           |                      | including who will have access to these interim results and make   |    |
| 24 |                            |                      | the final decision to terminate the trial                          |    |
| 25 |                            |                      |                                                                    |    |
| 26 |                            |                      |                                                                    |    |
| 27 | Harms                      | <a href="#">#22</a>  | Plans for collecting, assessing, reporting, and managing solicited | 15 |
| 28 |                            |                      | and spontaneously reported adverse events and other unintended     |    |
| 29 |                            |                      | effects of trial interventions or trial conduct                    |    |
| 30 |                            |                      |                                                                    |    |
| 31 |                            |                      |                                                                    |    |
| 32 |                            |                      |                                                                    |    |
| 33 | Auditing                   | <a href="#">#23</a>  | Frequency and procedures for auditing trial conduct, if any, and   | 15 |
| 34 |                            |                      | whether the process will be independent from investigators and     |    |
| 35 |                            |                      | the sponsor                                                        |    |
| 36 |                            |                      |                                                                    |    |
| 37 |                            |                      |                                                                    |    |
| 38 | <b>Ethics and</b>          |                      |                                                                    |    |
| 39 | <b>dissemination</b>       |                      |                                                                    |    |
| 40 |                            |                      |                                                                    |    |
| 41 |                            |                      |                                                                    |    |
| 42 | Research ethics            | <a href="#">#24</a>  | Plans for seeking research ethics committee / institutional review | 16 |
| 43 | approval                   |                      | board (REC / IRB) approval                                         |    |
| 44 |                            |                      |                                                                    |    |
| 45 |                            |                      |                                                                    |    |
| 46 | Protocol amendments        | <a href="#">#25</a>  | Plans for communicating important protocol modifications (eg,      | 16 |
| 47 |                            |                      | changes to eligibility criteria, outcomes, analyses) to relevant   |    |
| 48 |                            |                      | parties (eg, investigators, REC / IRBs, trial participants, trial  |    |
| 49 |                            |                      | registries, journals, regulators)                                  |    |
| 50 |                            |                      |                                                                    |    |
| 51 |                            |                      |                                                                    |    |
| 52 |                            |                      |                                                                    |    |
| 53 | Consent or assent          | <a href="#">#26a</a> | Who will obtain informed consent or assent from potential trial    | 15 |
| 54 |                            |                      | participants or authorised surrogates, and how (see Item 32)       |    |
| 55 |                            |                      |                                                                    |    |
| 56 |                            |                      |                                                                    |    |
| 57 |                            |                      |                                                                    |    |
| 58 |                            |                      |                                                                    |    |
| 59 |                            |                      |                                                                    |    |
| 60 |                            |                      |                                                                    |    |



|    |                          |                      |                                                                      |     |
|----|--------------------------|----------------------|----------------------------------------------------------------------|-----|
| 1  | Consent or assent:       | <a href="#">#26b</a> | Additional consent provisions for collection and use of              | 15  |
| 2  | ancillary studies        |                      | participant data and biological specimens in ancillary studies, if   |     |
| 3  |                          |                      | applicable                                                           |     |
| 4  |                          |                      |                                                                      |     |
| 5  |                          |                      |                                                                      |     |
| 6  | Confidentiality          | <a href="#">#27</a>  | How personal information about potential and enrolled                | 15  |
| 7  |                          |                      | participants will be collected, shared, and maintained in order to   |     |
| 8  |                          |                      | protect confidentiality before, during, and after the trial          |     |
| 9  |                          |                      |                                                                      |     |
| 10 |                          |                      |                                                                      |     |
| 11 | Declaration of interests | <a href="#">#28</a>  | Financial and other competing interests for principal investigators  | 16  |
| 12 |                          |                      | for the overall trial and each study site                            |     |
| 13 |                          |                      |                                                                      |     |
| 14 |                          |                      |                                                                      |     |
| 15 | Data access              | <a href="#">#29</a>  | Statement of who will have access to the final trial dataset, and    | 15  |
| 16 |                          |                      | disclosure of contractual agreements that limit such access for      |     |
| 17 |                          |                      | investigators                                                        |     |
| 18 |                          |                      |                                                                      |     |
| 19 |                          |                      |                                                                      |     |
| 20 | Ancillary and post trial | <a href="#">#30</a>  | Provisions, if any, for ancillary and post-trial care, and for       | 16  |
| 21 | care                     |                      | compensation to those who suffer harm from trial participation       |     |
| 22 |                          |                      |                                                                      |     |
| 23 |                          |                      |                                                                      |     |
| 24 | Dissemination policy:    | <a href="#">#31a</a> | Plans for investigators and sponsor to communicate trial results     | 16  |
| 25 | trial results            |                      | to participants, healthcare professionals, the public, and other     |     |
| 26 |                          |                      | relevant groups (eg, via publication, reporting in results           |     |
| 27 |                          |                      | databases, or other data sharing arrangements), including any        |     |
| 28 |                          |                      | publication restrictions                                             |     |
| 29 |                          |                      |                                                                      |     |
| 30 |                          |                      |                                                                      |     |
| 31 |                          |                      |                                                                      |     |
| 32 |                          |                      |                                                                      |     |
| 33 | Dissemination policy:    | <a href="#">#31b</a> | Authorship eligibility guidelines and any intended use of            | 16  |
| 34 | authorship               |                      | professional writers                                                 |     |
| 35 |                          |                      |                                                                      |     |
| 36 |                          |                      |                                                                      |     |
| 37 | Dissemination policy:    | <a href="#">#31c</a> | Plans, if any, for granting public access to the full protocol,      | 16  |
| 38 | reproducible research    |                      | participant-level dataset, and statistical code                      |     |
| 39 |                          |                      |                                                                      |     |
| 40 |                          |                      |                                                                      |     |
| 41 | <b>Appendices</b>        |                      |                                                                      |     |
| 42 |                          |                      |                                                                      |     |
| 43 | Informed consent         | <a href="#">#32</a>  | Model consent form and other related documentation given to          | Yes |
| 44 | materials                |                      | participants and authorised surrogates                               |     |
| 45 |                          |                      |                                                                      |     |
| 46 |                          |                      |                                                                      |     |
| 47 | Biological specimens     | <a href="#">#33</a>  | Plans for collection, laboratory evaluation, and storage of          | n/a |
| 48 |                          |                      | biological specimens for genetic or molecular analysis in the        |     |
| 49 |                          |                      | current trial and for future use in ancillary studies, if applicable |     |
| 50 |                          |                      |                                                                      |     |
| 51 |                          |                      |                                                                      |     |

The SPIRIT checklist is distributed under the terms of the Creative Commons Attribution License CC-BY-ND 3.0. This checklist was completed on 17. December 2019 using <https://www.goodreports.org/>, a tool made by the [EQUATOR Network](#) in collaboration with [Penelope.ai](#)
