# Supplementary material for: Protocol for a feasibility study of smoking cessation in the surgical pathway before major lung surgery: Project MURRAY
Source: PubMed Central journal article supplement (PMC7651715; doi:10.1136/bmjopen-2019-036568), 2020-11-06
Supplement: bmjopen-2019-036568supp001.pdf [file bmjopen-2019-036568supp001.pdf]

## APPENDIX

### Appendix A – Major cardiopulmonary complications as classified by the European Society of Thoracic Surgeons (ESTS)

**ARDS:** Adult respiratory distress syndrome defined according to the American-European consensus conference. All of the following criteria should be met:

1. Acute onset
2. Arterial hypoxemia with PaO<sub>2</sub>/FIO<sub>2</sub> ratio lower than 200 (regardless PEEP level)
3. Bilateral infiltrates at chest radiograph or CT scan
4. No clinical evidence of left atrial hypertension or pulmonary artery occlusive pressure <18 mmHg
5. Compatible risk factors

**Atrial Arrhythmia:** new onset of atrial fibrillation/flutter (AF) requiring medical treatment or cardioversion. Does not include recurrence of AF which had been present preoperatively.

**Ventricular Arrhythmia:** sustained ventricular tachycardia or ventricular fibrillation that has been clinically documented and treated by ablation therapy, implantable cardioverter defibrillator, permanent pacemaker, pharmacologic treatment or cardioversion.

**Bronchoscopy for atelectasis:** postoperative atelectasis documented clinically or radiographically that needed bronchoscopy.

**Pneumonia:** defined according to the last CDC criteria. Two or more serial chest radiographs with at least **one** of the following:

- New or progressive and persistent infiltrate
- Consolidation
- Cavitation

**AND** at least **one** of the following:

- Fever (>38°C or >100.4°F) with no other recognized cause
- Leukopenia (<4000 WBC/mm<sup>3</sup>) or leukocytosis (>12,000 WBC/mm<sup>3</sup>)
- For adults >70 years old, altered mental status with no other recognized cause

**AND** at least **two** of the following:

- New onset of purulent sputum, or change in character of sputum, or increased respiratory secretions, or increased suctioning requirements
- New onset or worsening cough, or dyspnea, or tachypnea

- Rales or bronchial breath sounds Worsening gas exchange (e.g. O<sub>2</sub> desaturations (e.g., PaO<sub>2</sub>/FiO<sub>2</sub> < 240), increased oxygen requirements, or increased ventilator demand).

**Pulmonary embolism:** confirmed by V/Q scan, angiogram or CT scan.

**DVT:** deep venous thrombosis confirmed by Doppler study, contrast study or other study and that required treatment.

**Myocardial infarct:** evidenced by one of the following criteria:

1. Transmural infarction diagnosed by the appearance of a new Q wave in two or more contiguous leads on ECG.
2. Subendocardial infarction (non Q wave) evidenced by clinical, angiographic electrocardiographic signs.
3. Laboratory isoenzyme evidence of myocardial necrosis.

**Renal failure:** defined as the onset of new renal failure in the postoperative period according to one of the following criteria:

1. Increase of serum creatinine to greater than 2.0, and 2-fold the preoperative creatinine level.
2. A new requirement for dialysis postoperatively.

**Neurological complication:** occurrence of one of the following central neurologic postoperative events not present preoperatively:

1. A central neurologic deficit persisting postoperatively for more than 72 hours
2. A transient neurologic deficit (transient ischemic attack or reversible ischemic neurological deficit) with recovery within 72 hours
3. A new postoperative coma persisting at least 24 hours and caused by anoxic/ischemic and/or metabolic encephalopathy, thromboembolic event or cerebral bleed

### Appendix B – Seeley Systematic Classification of Morbidity and Mortality After Thoracic Surgery (TM &M) Classification of Severity

Complication: Any deviation from the normal postoperative course.

| <b>Minor</b>     |                                                                                                 |
|------------------|-------------------------------------------------------------------------------------------------|
| Grade I          | Any complication without need for pharmacologic treatment or other intervention.                |
| Grade II         | Any complication that requires pharmacologic treatment or minor intervention only.              |
| <b>Major</b>     |                                                                                                 |
| Grade III        | Any complication that requires surgical, radiologic, endoscopic intervention, or multi-therapy. |
| Grade IIIa       | Intervention does not require general anaesthesia.                                              |
| Grade IIIb       | Intervention requires general anaesthesia.                                                      |
| Grade IV         | Any complication requiring intensive care unit management and life support.                     |
| Grade IVa        | Single organ dysfunction.                                                                       |
| Grade IVb        | Multi-organ dysfunction.                                                                        |
| <b>Mortality</b> |                                                                                                 |
| Grade V          | Any complication leading to the death of the patient.                                           |

## Appendix C – StEP Core Outcome Measures in Perioperative and Anaesthetic Care (COMPAC) – Post-operative Pulmonary Complications

### Post-operative Pulmonary Complications\*

Composite of respiratory diagnoses that share common pathophysiological mechanisms including pulmonary collapse and airway contamination:

- (i) atelectasis detected on computed tomography or chest radiograph,
- (ii) pneumonia using US Centers for Disease Control criteria,
- (iii) Acute Respiratory Distress Syndrome using Berlin consensus definition,
- (iv) pulmonary aspiration (clear clinical history **AND** radiological evidence).

### \*Exclusions

Other diagnoses that do not share a common biological mechanism are best evaluated separately and only when clearly relevant to the treatment under investigation:

- (i) pulmonary embolism,
- (ii) pleural effusion,
- (iii) cardiogenic pulmonary oedema,
- (iv) pneumothorax,
- (v) bronchospasm.

### ARDS - Berlin definition

Timing: within 1 week of a known clinical insult or new or worsening respiratory symptoms

**AND** Chest imaging: bilateral opacities not fully explained by effusions, lobar/lung collapse or nodules

**AND** Origin of oedema: respiratory failure not fully explained by cardiac failure or fluid overload (requires objective assessment, e.g. echocardiography, to exclude hydrostatic oedema),

**AND** Oxygenation:

Mild PaO<sub>2</sub>:FiO<sub>2</sub> between 26.7 - 40.0 kPa (200-300 mm Hg) with PEEP or CPAP ≥ 5 cm H<sub>2</sub>O;

Moderate PaO<sub>2</sub>:FiO<sub>2</sub> between 13.3 - 26.6 kPa (100-200 mm Hg) with PEEP ≥ 5 cmH<sub>2</sub>O;

Severe PaO<sub>2</sub>:FiO<sub>2</sub> ≤ 13.3 kPa (100 mm Hg) with PEEP ≥ 5 cm H<sub>2</sub>O.

Mechanical ventilation:

The need for need for tracheal re-intubation and mechanical ventilation after extubation, and within 30 days after surgery OR mechanical ventilation for more than 24 h after surgery. The inclusion of non-invasive ventilation may be considered on a study-by-study basis.

### Post-operative Pneumonia

Two or more serial chest radiographs with at least one of the following (one radiograph is sufficient for patients with no underlying pulmonary or cardiac disease):

- (i) New or progressive and persistent infiltrates,
- (ii) consolidation
- (iii) cavitation;

**AND** at least **one** of the following:

- (a) fever ( $>38^{\circ}\text{C}$ ) with no other recognised cause,
- (b) leucopaenia (white cell count  $<4 \times 10^9/l$ ) or leucocytosis (white cell count  $>12 \times 10^9/l$ ),
- (c) for adults  $>70$  years old, altered mental status with no other recognised cause;

**AND** at least **two** of the following:

- (a) new onset of purulent sputum or change in character of sputum, or increased respiratory secretions, or increased suctioning requirements,
- (b) new onset or worsening cough, or dyspnoea, or tachypnoea,
- (c) rales or bronchial breath sounds,
- (d) worsening gas exchange (hypoxaemia, increased oxygen requirement, increased ventilator demand).
